# Supplementary material for: p-Terphenyls From Aspergillus sp. GZWMJZ-055: Identification, Derivation, Antioxidant and α-Glycosidase Inhibitory Activities
Source: PubMed Central journal article supplement (PMC7947296; doi:10.3389/fmicb.2021.654963), 2021-02-25

## *Supplementary Material*

### ***p*-Terphenyls from *Aspergillus* sp. GZWMJZ-055: Identification, Derivation, Antioxidant and $\alpha$ -Glycosidase Inhibitory Activities**

**Yanchao Xu<sup>1,2,3†</sup>, Yong Wang<sup>1,2,3†</sup>, Dan Wu<sup>1,3</sup>, Wenwen He<sup>1,3</sup>, Liping Wang<sup>1,2,3\*</sup>, and Weiming Zhu<sup>1,4\*</sup>**

<sup>1</sup> State Key Laboratory of Functions and Applications of Medicinal Plants, Guizhou Medical University, Guiyang 550014, China

<sup>2</sup> School of Pharmaceutical Sciences, Guizhou Medical University, Guiyang 550025, China

<sup>3</sup> Key Laboratory of Chemistry for Natural Products of Guizhou Province, Chinese Academy of Sciences, Guiyang 550014, China

<sup>4</sup> Laboratory for Marine Drugs and Bioproducts, Pilot National Laboratory for Marine Science and Technology, School of Medicine and Pharmacy, Ocean University of China, Qingdao 266003, China.

**\*Correspondence:**

Weiming Zhu  
weimingzhu@ouc.edu.cn

Liping Wang  
lipingw2006@163.com

†These authors contributed equally to this work.

### **List of Supporting Information**

---

|                                                                                                                                                                    |     |
|--------------------------------------------------------------------------------------------------------------------------------------------------------------------|-----|
| <b>Table S1.</b> <sup>1</sup> H (600 MHz) and <sup>13</sup> C (150 MHz) NMR Data for Compounds <b>2–4</b> in DMSO- <i>d</i> <sub>6</sub> .....                     | S3  |
| <b>Table S2.</b> <sup>1</sup> H (600 MHz) and <sup>13</sup> C (150 MHz) NMR Data of compounds <b>5–7</b> in DMSO- <i>d</i> <sub>6</sub> .....                      | S3  |
| <b>Table S3.</b> <sup>1</sup> H (600 MHz) and <sup>13</sup> C (150 MHz) NMR Data of compounds <b>8–10</b> in DMSO- <i>d</i> <sub>6</sub> .....                     | S4  |
| <b>Table S4.</b> <sup>1</sup> H (600 MHz) and <sup>13</sup> C (150 MHz) NMR Data of compounds <b>11–13</b> in DMSO- <i>d</i> <sub>6</sub> .....                    | S4  |
| <b>Table S5.</b> <sup>1</sup> H (600 MHz) and <sup>13</sup> C (150 MHz) NMR Data of compounds <b>14–16</b> in DMSO- <i>d</i> <sub>6</sub> .....                    | S5  |
| <b>Table S6.</b> <sup>1</sup> H (600 MHz) and <sup>13</sup> C (150 MHz) NMR Data of compounds <b>17, 20, 23</b> and <b>24</b> in DMSO- <i>d</i> <sub>6</sub> ..... | S5  |
| <b>Figure S1.</b> Phylogenetic tree of ITS sequence for <i>Aspergillus</i> sp. GZWMJZ-055 .....                                                                    | S6  |
| <b>Figure S2.</b> HRESIMS spectrum of compound <b>1</b> .....                                                                                                      | S6  |
| <b>Figure S3.</b> <sup>1</sup> H NMR spectrum of compound <b>1</b> in DMSO- <i>d</i> <sub>6</sub> .....                                                            | S7  |
| <b>Figure S4.</b> <sup>13</sup> C NMR spectrum of compound <b>1</b> in DMSO- <i>d</i> <sub>6</sub> .....                                                           | S7  |
| <b>Figure S5.</b> HMQC spectrum of compound <b>1</b> in DMSO- <i>d</i> <sub>6</sub> .....                                                                          | S8  |
| <b>Figure S6.</b> <sup>1</sup> H- <sup>1</sup> H COSY spectrum of compound <b>1</b> in DMSO- <i>d</i> <sub>6</sub> .....                                           | S8  |
| <b>Figure S7.</b> HMBC spectrum of compound <b>1</b> in DMSO- <i>d</i> <sub>6</sub> .....                                                                          | S9  |
| <b>Figure S8.</b> <sup>1</sup> H NMR spectrum of compound <b>15</b> in DMSO- <i>d</i> <sub>6</sub> .....                                                           | S9  |
| <b>Figure S9.</b> <sup>13</sup> C NMR spectrum of compound <b>15</b> in DMSO- <i>d</i> <sub>6</sub> .....                                                          | S10 |
| <b>Figure S10.</b> <sup>1</sup> H NMR spectrum of compound <b>16</b> in DMSO- <i>d</i> <sub>6</sub> .....                                                          | S10 |

|                                                                                                                                                |     |
|------------------------------------------------------------------------------------------------------------------------------------------------|-----|
| <b>Figure S11.</b> $^{13}\text{C}$ NMR spectrum of compound <b>16</b> in $\text{DMSO-}d_6$ .....                                               | S11 |
| <b>Figure S12.</b> $^1\text{H}$ NMR spectrum of compound <b>17</b> in $\text{DMSO-}d_6$ .....                                                  | S11 |
| <b>Figure S13.</b> $^{13}\text{C}$ NMR spectrum of compound <b>17</b> in $\text{DMSO-}d_6$ .....                                               | S12 |
| <b>Figure S14.</b> HRESIMS spectrum of compound <b>18</b> .....                                                                                | S12 |
| <b>Figure S15.</b> $^1\text{H}$ NMR spectrum of compound <b>18</b> in $\text{DMSO-}d_6$ .....                                                  | S13 |
| <b>Figure S16.</b> $^{13}\text{C}$ NMR spectrum of compound <b>18</b> in $\text{DMSO-}d_6$ .....                                               | S13 |
| <b>Figure S17.</b> HRESIMS spectrum of compound <b>19</b> .....                                                                                | S14 |
| <b>Figure S18.</b> $^1\text{H}$ NMR spectrum of compound <b>19</b> in $\text{DMSO-}d_6$ .....                                                  | S14 |
| <b>Figure S19.</b> $^{13}\text{C}$ NMR spectrum of compound <b>19</b> in $\text{DMSO-}d_6$ .....                                               | S15 |
| <b>Figure S20.</b> $^1\text{H}$ NMR spectrum of compound <b>20</b> in $\text{DMSO-}d_6$ .....                                                  | S15 |
| <b>Figure S21.</b> $^{13}\text{C}$ NMR spectrum of compound <b>20</b> in $\text{DMSO-}d_6$ .....                                               | S16 |
| <b>Figure S22.</b> HRESIMS spectrum of compound <b>21</b> .....                                                                                | S16 |
| <b>Figure S23.</b> $^1\text{H}$ NMR spectrum of compound <b>21</b> in $\text{DMSO-}d_6$ .....                                                  | S17 |
| <b>Figure S24.</b> $^{13}\text{C}$ NMR spectrum of compound <b>21</b> in $\text{DMSO-}d_6$ .....                                               | S17 |
| <b>Figure S25.</b> HRESIMS spectrum of compound <b>22</b> .....                                                                                | S18 |
| <b>Figure S26.</b> $^1\text{H}$ NMR spectrum of compound <b>22</b> in $\text{DMSO-}d_6$ .....                                                  | S18 |
| <b>Figure S27.</b> $^{13}\text{C}$ NMR spectrum of compound <b>22</b> in $\text{DMSO-}d_6$ .....                                               | S19 |
| <b>Figure S28.</b> HRESIMS spectrum of compound <b>23</b> .....                                                                                | S19 |
| <b>Figure S29.</b> $^1\text{H}$ NMR spectrum of compound <b>23</b> in $\text{DMSO-}d_6$ .....                                                  | S20 |
| <b>Figure S30.</b> $^{13}\text{C}$ NMR spectrum of compound <b>23</b> in $\text{DMSO-}d_6$ .....                                               | S20 |
| <b>Figure S31.</b> $^1\text{H}$ NMR spectrum of compound <b>24</b> in $\text{CDCl}_3$ .....                                                    | S21 |
| <b>Figure S32.</b> $^{13}\text{C}$ NMR spectrum of compound <b>24</b> in $\text{CDCl}_3$ .....                                                 | S21 |
| <b>Figure S33.</b> HRESIMS spectrum of compound <b>25</b> .....                                                                                | S22 |
| <b>Figure S34.</b> $^1\text{H}$ NMR spectrum of compound <b>25</b> in $\text{CDCl}_3$ .....                                                    | S22 |
| <b>Figure S35.</b> $^{13}\text{C}$ NMR spectrum of compound <b>25</b> in $\text{CDCl}_3$ .....                                                 | S23 |
| <b>Figure S36.</b> ORAC curves of compounds <b>1–25</b> and trolox.....                                                                        | S23 |
| <b>Figure S37.</b> HPLC detection for transformation of compound <b>6</b> to compound <b>15</b> in different conditions and reaction time..... | S24 |

**Table S1.**  $^1\text{H}$  (600 MHz) and  $^{13}\text{C}$  (150 MHz) NMR Data of compounds **2–4** in  $\text{DMSO-}d_6$ 

| position | <b>2</b>              |                               | <b>3</b>            |                               | <b>4</b>              |                               |
|----------|-----------------------|-------------------------------|---------------------|-------------------------------|-----------------------|-------------------------------|
|          | $\delta_{\text{C}}$   | $\delta_{\text{H}}$ (J in Hz) | $\delta_{\text{C}}$ | $\delta_{\text{H}}$ (J in Hz) | $\delta_{\text{C}}$   | $\delta_{\text{H}}$ (J in Hz) |
| 1        | 134.4, C              |                               | 123.9, C            |                               | 124.8, C              |                               |
| 2        | 130.9, CH             | 7.29, d (7.9)                 | 131.4, CH           | 7.11, d (8.5)                 | 131.9, CH             | 7.09, d (8.5)                 |
| 3        | 127.5, CH             | 7.36, t (7.9)                 | 114.6, CH           | 6.79, d (8.5)                 | 114.5, CH             | 6.76, d (8.5)                 |
| 4        | 126.4, CH             | 7.26, t (7.9)                 | 156.3, C            |                               | 155.9, C              |                               |
| 5        | 127.5, CH             | 7.36, t (7.9)                 | 114.6, CH           | 6.79, d (8.5)                 | 114.5, CH             | 6.76, d (8.5)                 |
| 6        | 130.9, CH             | 7.29, d (7.9)                 | 131.4, CH           | 7.11, d (8.5)                 | 131.9, CH             | 7.09, d (8.5)                 |
| 1'       | 116.8, C              |                               | 124.5, C            |                               | 117.2, C              |                               |
| 2'       | 148.1, C              |                               | 151.5, C            |                               | 145.0, C              |                               |
| 3'       | 139.3, C              |                               | 144.3, C            |                               | 136.2, C              |                               |
| 4'       | 133.0, C              |                               | 133.9, C            |                               | 129.6, C              |                               |
| 5'       | 102.9, CH             | 6.42, s                       | 108.0, CH           | 6.73, s                       | 103.3, CH             | 6.36, s                       |
| 6'       | 152.9, C              |                               | 152.9, C            |                               | 150.5, C              |                               |
| 1''      | 128.6, C              |                               | 138.0, C            |                               | 127.9, C              |                               |
| 2''      | 129.8, CH             | 7.45, d (8.5)                 | 129.0, CH           | 7.57, d (7.3)                 | 130.2, CH             | 7.42, d (8.5)                 |
| 3''      | 115.2, CH             | 6.85, d (8.5)                 | 128.2, CH           | 7.46, t (7.3)                 | 114.9, CH             | 6.81, d (8.5)                 |
| 4''      | 156.8, C              |                               | 127.3, CH           | 7.37, t (7.3)                 | 156.3, C              |                               |
| 5''      | 115.2, CH             | 6.85, d (8.5)                 | 128.2, CH           | 7.46, t (7.3)                 | 114.9, CH             | 6.81, d (8.5)                 |
| 6''      | 129.8, CH             | 7.45, d (8.5)                 | 129.0, CH           | 7.57, d (7.3)                 | 130.2, CH             | 7.42, d (8.5)                 |
| 3-OMe    |                       |                               |                     |                               |                       |                               |
| 2'-OMe   | 60.5, CH <sub>3</sub> | 3.52, s                       |                     |                               |                       |                               |
| 3'-OMe   | 60.3, CH <sub>3</sub> | 3.51, s                       |                     |                               |                       |                               |
| 6'-OMe   | 55.8, CH <sub>3</sub> | 3.67, s                       |                     |                               | 55.7, CH <sub>3</sub> | 3.59, s                       |

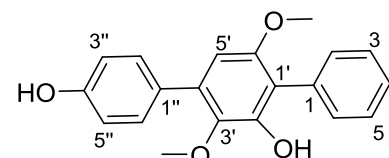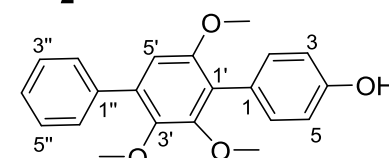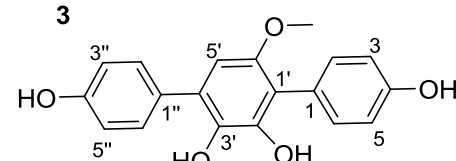**Table S2.**  $^1\text{H}$  (600 MHz) and  $^{13}\text{C}$  (150 MHz) NMR Data of compounds **5–7** in  $\text{DMSO-}d_6$ 

| position | <b>5</b>              |                               | <b>6</b>              |                               | <b>7</b>              |                               |
|----------|-----------------------|-------------------------------|-----------------------|-------------------------------|-----------------------|-------------------------------|
|          | $\delta_{\text{C}}$   | $\delta_{\text{H}}$ (J in Hz) | $\delta_{\text{C}}$   | $\delta_{\text{H}}$ (J in Hz) | $\delta_{\text{C}}$   | $\delta_{\text{H}}$ (J in Hz) |
| 1        | 124.4, C              |                               | 125.0, C              |                               | 125.1, C              |                               |
| 2        | 131.9, CH             | 7.09, d (8.5)                 | 118.5, CH             | 6.68, d (1.9)                 | 118.5, CH             | 6.68, d (2.0)                 |
| 3        | 114.4, CH             | 6.76, d (8.5)                 | 143.9, C              |                               | 144.0, C              |                               |
| 4        | 156.1, C              |                               | 144.3, C              |                               | 144.3, C              |                               |
| 5        | 114.4, CH             | 6.76, d (8.5)                 | 114.8, CH             | 6.71, d (8.0)                 | 114.9, CH             | 6.71, d (8.0)                 |
| 6        | 131.9, CH             | 7.09, d (8.5)                 | 122.0, CH             | 6.54, dd (8.0, 1.9)           | 122.0, CH             | 6.54, dd (8.0, 2.0)           |
| 1'       | 116.9, C              |                               | 117.2, C              |                               | 117.1, C              |                               |
| 2'       | 148.2, C              |                               | 148.2, C              |                               | 148.2, C              |                               |
| 3'       | 139.3, C              |                               | 139.3, C              |                               | 139.3, C              |                               |
| 4'       | 132.4, C              |                               | 132.3, C              |                               | 132.5, C              |                               |
| 5'       | 102.9, CH             | 6.38, s                       | 102.9, CH             | 6.37, s                       | 102.9, CH             | 6.34, s                       |
| 6'       | 153.1, C              |                               | 153.1, C              |                               | 153.1, C              |                               |
| 1''      | 128.5, C              |                               | 128.8, C              |                               | 129.4, C              |                               |
| 2''      | 129.7, CH             | 7.42, d (8.5)                 | 129.8, CH             | 7.43, d (8.5)                 | 116.2, CH             | 7.04, d (2.0)                 |
| 3''      | 115.3, CH             | 6.85, d (8.5)                 | 115.2, CH             | 6.83, d (8.5)                 | 145.0, C              |                               |
| 4''      | 157.1, C              |                               | 156.8, C              |                               | 144.8, C              |                               |
| 5''      | 115.3, CH             | 6.85, d (8.5)                 | 115.2, CH             | 6.83, d (8.5)                 | 115.6, CH             | 6.80, d (8.0)                 |
| 6''      | 129.7, CH             | 7.42, d (8.5)                 | 129.8, CH             | 7.43, d (8.5)                 | 119.7, CH             | 6.88, dd (8.0, 2.0)           |
| 3'-OMe   | 60.1, CH <sub>3</sub> | 3.29, s                       | 60.1, CH <sub>3</sub> | 3.29, s                       | 60.1, CH <sub>3</sub> | 3.31, s                       |
| 6'-OMe   | 55.6, CH <sub>3</sub> | 3.63, s                       | 55.6, CH <sub>3</sub> | 3.62, s                       | 55.6, CH <sub>3</sub> | 3.62, s                       |

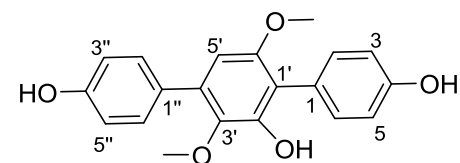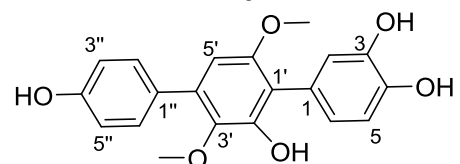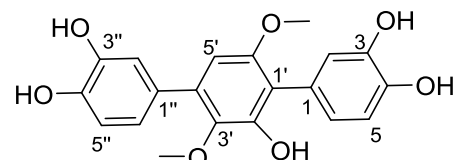

**Table S3.**  $^1\text{H}$  (600 MHz) and  $^{13}\text{C}$  (150 MHz) NMR Data of compounds **8–10** in  $\text{DMSO-}d_6$ 

| position | <b>8</b>              |                               | <b>9</b>              |                               | <b>10</b>             |                               |
|----------|-----------------------|-------------------------------|-----------------------|-------------------------------|-----------------------|-------------------------------|
|          | $\delta_{\text{C}}$   | $\delta_{\text{H}}$ (J in Hz) | $\delta_{\text{C}}$   | $\delta_{\text{H}}$ (J in Hz) | $\delta_{\text{C}}$   | $\delta_{\text{H}}$ (J in Hz) |
| 1        | 124.4, C              |                               | 124.8, C              |                               | 123.8, C              |                               |
| 2        | 131.9, CH             | 7.10, d (8.5)                 | 118.4, CH             | 6.68, s                       | 131.5, CH             | 7.09, d (8.5)                 |
| 3        | 114.4, CH             | 6.75, d (8.5)                 | 144.0, C              |                               | 114.7, CH             | 6.78, d (8.5)                 |
| 4        | 156.0, C              |                               | 144.3, C              |                               | 156.3, C              |                               |
| 5        | 114.4, CH             | 6.75, d (8.5)                 | 114.8, CH             | 6.71, d (8.0)                 | 114.7, CH             | 6.78, d (8.5)                 |
| 6        | 131.9, CH             | 7.10, d (8.5)                 | 121.9, CH             | 6.54, d (8.0)                 | 131.5, CH             | 7.09, d (8.5)                 |
| 1'       | 117.8, C              |                               | 118.1, C              |                               | 124.2, C              |                               |
| 2'       | 148.3, C              |                               | 148.2, C              |                               | 151.6, C              |                               |
| 3'       | 139.5, C              |                               | 139.4, C              |                               | 144.3, C              |                               |
| 4'       | 132.5, C              |                               | 132.3, C              |                               | 134.0, C              |                               |
| 5'       | 103.2, CH             | 6.43, s                       | 103.2, CH             | 6.42, s                       | 107.8, CH             | 6.67, s                       |
| 6'       | 153.2, C              |                               | 153.2, C              |                               | 152.9, C              |                               |
| 1''      | 138.3, C              |                               | 138.2, C              |                               | 128.6, C              |                               |
| 2''      | 128.7, CH             | 7.60, d (7.5)                 | 128.7, CH             | 7.60, d (7.5)                 | 130.2, CH             | 7.39, d (8.5)                 |
| 3''      | 128.4, CH             | 7.45, t (7.5)                 | 128.3, CH             | 7.45, t (7.5)                 | 115.2, CH             | 6.84, d (8.5)                 |
| 4''      | 127.3, CH             | 7.36, t (7.5)                 | 127.2, CH             | 7.36, t (7.5)                 | 156.9, C              |                               |
| 5''      | 128.4, CH             | 7.45, t (7.5)                 | 128.3, CH             | 7.45, t (7.5)                 | 115.2, CH             | 6.84, d (8.5)                 |
| 6''      | 128.7, CH             | 7.60, d (7.5)                 | 128.7, CH             | 7.60, d (7.5)                 | 130.2, CH             | 7.39, d (8.5)                 |
| 2'-OMe   |                       |                               |                       |                               | 60.4, CH <sub>3</sub> | 3.50, s                       |
| 3'-OMe   | 60.4, CH <sub>3</sub> | 3.28, s                       | 60.3, CH <sub>3</sub> | 3.29, s                       | 60.4, CH <sub>3</sub> | 3.48, s                       |
| 6'-OMe   | 55.7, CH <sub>3</sub> | 3.64, s                       | 55.6, CH <sub>3</sub> | 3.64, s                       | 55.9, CH <sub>3</sub> | 3.65, s                       |

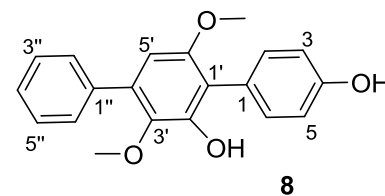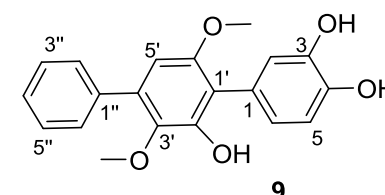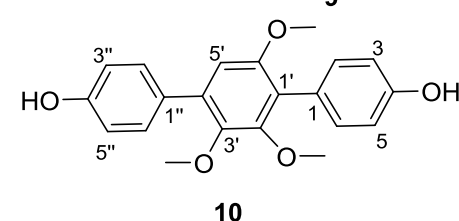**Table S4.**  $^1\text{H}$  (600 MHz) and  $^{13}\text{C}$  (150 MHz) NMR Data of compounds **11–13** in  $\text{DMSO-}d_6$ 

| position | <b>11</b>             |                               | <b>12</b>             |                               | <b>13</b>             |                               |
|----------|-----------------------|-------------------------------|-----------------------|-------------------------------|-----------------------|-------------------------------|
|          | $\delta_{\text{C}}$   | $\delta_{\text{H}}$ (J in Hz) | $\delta_{\text{C}}$   | $\delta_{\text{H}}$ (J in Hz) | $\delta_{\text{C}}$   | $\delta_{\text{H}}$ (J in Hz) |
| 1        | 124.4, C              |                               | 125.0, C              |                               | 126.7, C              |                               |
| 2        | 131.1, CH             | 6.96, d (2.0)                 | 118.4, CH             | 6.67, d (2.0)                 | 115.0, CH             | 6.86, d (1.9)                 |
| 3        | 126.2, C              |                               | 143.9, C              |                               | 148.2, C              |                               |
| 4        | 153.6, C              |                               | 144.3, C              |                               | 146.6, C              |                               |
| 5        | 114.0, CH             | 6.77, d (8.0)                 | 114.8, CH             | 6.70, d (8.0)                 | 112.5, CH             | 6.95, d (8.2)                 |
| 6        | 129.1, CH             | 6.93, dd (8.0, 2.0)           | 121.9, CH             | 6.52, dd (8.0, 2.0)           | 123.2, CH             | 6.80, dd (8.2, 1.9)           |
| 1'       | 118.0, C              |                               | 117.2, C              |                               | 116.8, C              |                               |
| 2'       | 148.2, C              |                               | 148.2, C              |                               | 148.2, C              |                               |
| 3'       | 139.5, C              |                               | 139.2, C              |                               | 139.3, C              |                               |
| 4'       | 132.3, C              |                               | 132.4, C              |                               | 132.7, C              |                               |
| 5'       | 103.2, CH             | 6.43, s                       | 102.9, CH             | 6.33, s                       | 103.0, CH             | 6.40, s                       |
| 6'       | 153.2, C              |                               | 153.1, C              |                               | 153.1, C              |                               |
| 1''      | 138.3, C              |                               | 128.8, C              |                               | 128.7, C              |                               |
| 2''      | 128.7, CH             | 7.60, d (7.5)                 | 129.7, CH             | 7.30, d (2.0)                 | 129.8, CH             | 7.43, d (8.6)                 |
| 3''      | 128.4, CH             | 7.46, t (7.5)                 | 127.2, C              |                               | 115.2, CH             | 6.85, d (8.6)                 |
| 4''      | 127.2, CH             | 7.36, t (7.5)                 | 154.3, C              |                               | 156.8, C              |                               |
| 5''      | 128.4, CH             | 7.46, t (7.5)                 | 114.8, CH             | 6.84, d (8.2)                 | 115.2, CH             | 6.85, d (8.6)                 |
| 6''      | 128.7, CH             | 7.60, d (7.5)                 | 126.9, CH             | 7.23, dd (8.2, 2.0)           | 129.8, CH             | 7.43, d (8.6)                 |
| 1'''     | 28.2, CH <sub>2</sub> | 3.22, d (6.6)                 | 28.1, CH <sub>2</sub> | 3.25, d (7.3)                 | 64.9, CH <sub>2</sub> | 4.52, d (6.7)                 |
| 2'''     | 123.1, CH             | 5.31, t (6.6)                 | 122.9, CH             | 5.32, t (7.3)                 | 120.4, CH             | 5.47, t (6.7)                 |
| 3'''     | 131.7, C              |                               | 131.4, C              |                               | 136.9, C              |                               |
| 4'''     | 17.7, CH <sub>3</sub> | 1.67, s                       | 17.7, CH <sub>3</sub> | 1.68, s                       | 18.1, CH <sub>3</sub> | 1.71, s                       |
| 5'''     | 25.7, CH <sub>3</sub> | 1.68, s                       | 25.6, CH <sub>3</sub> | 1.69, s                       | 25.5, CH <sub>3</sub> | 1.76, s                       |
| 3-OMe    |                       |                               |                       |                               | 55.5, CH <sub>3</sub> | 3.72, s                       |
| 3'-OMe   | 60.4, CH <sub>3</sub> | 3.28, s                       | 60.0, CH <sub>3</sub> | 3.28, s                       | 60.1, CH <sub>3</sub> | 3.30, s                       |
| 6'-OMe   | 55.6, CH <sub>3</sub> | 3.64, s                       | 55.6, CH <sub>3</sub> | 3.61, s                       | 55.6, CH <sub>3</sub> | 3.65, s                       |

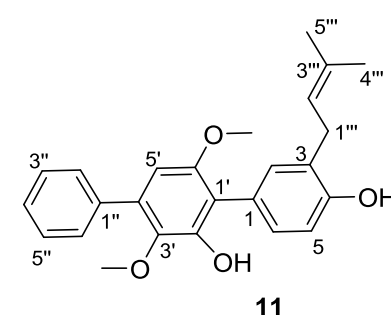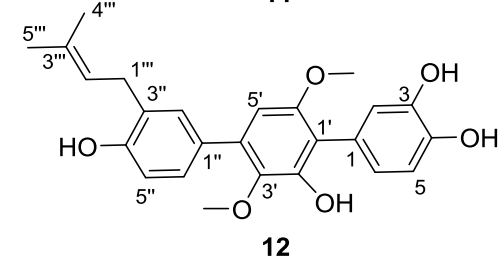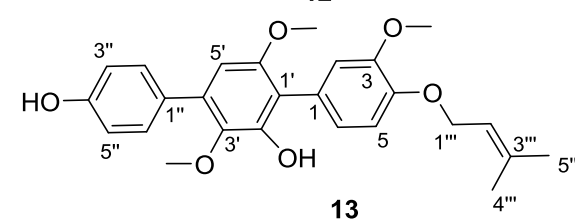

**Table S5.**  $^1\text{H}$  (600 MHz) and  $^{13}\text{C}$  (150 MHz) NMR Data of compounds **14–16** in  $\text{DMSO-}d_6$ 

| position | <b>14</b>             |                               | <b>15</b>             |                               | <b>16</b>             |                               |
|----------|-----------------------|-------------------------------|-----------------------|-------------------------------|-----------------------|-------------------------------|
|          | $\delta_{\text{C}}$   | $\delta_{\text{H}}$ (J in Hz) | $\delta_{\text{C}}$   | $\delta_{\text{H}}$ (J in Hz) | $\delta_{\text{C}}$   | $\delta_{\text{H}}$ (J in Hz) |
| 1        | 114.8, C              |                               | 114.0, C              |                               | 113.9, C              |                               |
| 2        | 149.4, C              |                               | 149.3, C              |                               | 149.4, C              |                               |
| 3        | 98.5, CH              | 7.08, s                       | 98.5, CH              | 7.07, s                       | 98.5, CH              | 7.07, s                       |
| 4        | 146.1, C              |                               | 145.8, C              |                               | 145.9, C              |                               |
| 5        | 142.7, C              |                               | 142.5, C              |                               | 142.6, C              |                               |
| 6        | 107.1, CH             | 7.38, s                       | 107.0, CH             | 7.37, s                       | 107.1, CH             | 7.37, s                       |
| 1'       | 113.5, C              |                               | 113.6, C              |                               | 113.7, C              |                               |
| 2'       | 148.2, C              |                               | 148.4, C              |                               | 148.5, C              |                               |
| 3'       | 136.1, C              |                               | 135.9, C              |                               | 136.0, C              |                               |
| 4'       | 130.4, C              |                               | 130.5, C              |                               | 130.9, C              |                               |
| 5'       | 105.8, CH             | 6.75, s                       | 105.5, CH             | 6.71, s                       | 105.6, CH             | 6.68, s                       |
| 6'       | 149.5, C              |                               | 149.4, C              |                               | 149.4, C              |                               |
| 1''      | 138.1, C              |                               | 128.6, C              |                               | 129.2, C              |                               |
| 2''      | 129.3, CH             | 7.58, d (7.5)                 | 130.4, CH             | 7.42, d (8.2)                 | 116.8, CH             | 7.03, s                       |
| 3''      | 128.3, CH             | 7.45, t (7.5)                 | 115.1, CH             | 6.85, d (8.2)                 | 144.9, C              |                               |
| 4''      | 127.1, CH             | 7.36, t (7.5)                 | 156.7, C              |                               | 144.8, C              |                               |
| 5''      | 128.3, CH             | 7.45, t (7.5)                 | 115.1, CH             | 6.85, d (8.2)                 | 115.5, CH             | 6.81, d (7.8)                 |
| 6''      | 129.3, CH             | 7.58, d (7.5)                 | 130.4, CH             | 7.42, d (8.2)                 | 120.4, CH             | 6.87, d (7.8)                 |
| 3'-OMe   | 60.8, CH <sub>3</sub> | 3.78, s                       | 60.6, CH <sub>3</sub> | 3.75, s                       | 60.7, CH <sub>3</sub> | 3.74, s                       |
| 6'-OMe   | 55.9, CH <sub>3</sub> | 3.98, s                       | 55.8, CH <sub>3</sub> | 3.97, s                       | 55.9, CH <sub>3</sub> | 3.97, s                       |

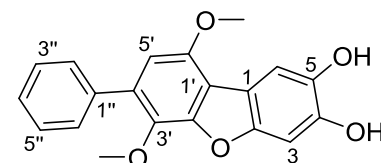**14**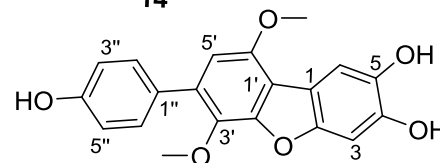**15**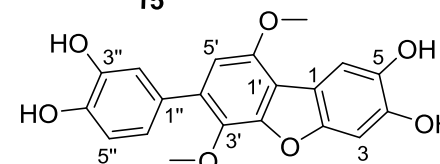**16****Table S6.**  $^1\text{H}$  (600 MHz) and  $^{13}\text{C}$  (150 MHz) NMR Data of compounds **17, 20, 23** and **24** in  $\text{DMSO-}d_6$ 

| position | <b>17</b>           |                               | <b>20</b>           |                               | <b>23<sup>a</sup></b> |                               | <b>24<sup>b</sup></b> |                               |
|----------|---------------------|-------------------------------|---------------------|-------------------------------|-----------------------|-------------------------------|-----------------------|-------------------------------|
|          | $\delta_{\text{C}}$ | $\delta_{\text{H}}$ (J in Hz) | $\delta_{\text{C}}$ | $\delta_{\text{H}}$ (J in Hz) | $\delta_{\text{C}}$   | $\delta_{\text{H}}$ (J in Hz) | $\delta_{\text{C}}$   | $\delta_{\text{H}}$ (J in Hz) |
| 1        | 125.3, C            |                               | 121.3, C            |                               | 130.0, C              |                               | 130.9, C              |                               |
| 2        | 131.9, CH           | 7.15, d (8.5)                 | 132.1, CH           | 7.20, d (8.0)                 | 131.0, CH             | 7.26, d (8.5)                 | 124.9, CH             | 7.11, s                       |
| 3        | 114.3, CH           | 6.75, d (8.5)                 | 114.5, CH           | 6.79, d (8.0)                 | 121.4, CH             | 7.18, d (8.5)                 | 141.5, C              |                               |
| 4        | 155.7, C            |                               | 157.0, CH           |                               | 149.8, C              |                               | 141.3, C              |                               |
| 5        | 114.3, CH           | 6.75, d (8.5)                 | 114.5, CH           | 6.79, d (8.0)                 | 121.4, CH             | 7.18, d (8.5)                 | 123.2, CH             | 7.31, d (8.5)                 |
| 6        | 131.9, CH           | 7.15, d (8.5)                 | 132.1, CH           | 7.20, d (8.0)                 | 131.0, CH             | 7.26, d (8.5)                 | 128.5, CH             | 7.18, d (8.5)                 |
| 1'       | 115.7, C            |                               | 118.9, C            |                               | 123.4, C              |                               | 122.4, C              |                               |
| 2'       | 145.1, C            |                               | 152.3, C            |                               | 142.4, C              |                               | 142.4, C              |                               |
| 3'       | 134.4, C            |                               | 183.4, C            |                               | 143.0, C              |                               | 143.0, C              |                               |
| 4'       | 129.6, C            |                               | 141.7, C            |                               | 133.6, C              |                               | 133.9, C              |                               |
| 5'       | 106.6, CH           | 6.28, s                       | 131.2, CH           | 6.73, s                       | 110.5, CH             | 7.00, s                       | 110.6, CH             | 7.02, s                       |
| 6'       | 148.2, C            |                               | 187.0, C            |                               | 152.7, C              |                               | 152.5, C              |                               |
| 1''      | 128.4, C            |                               | 123.1, C            |                               | 134.7, C              |                               | 134.6, C              |                               |
| 2''      | 129.9, CH           | 7.35, d (8.5)                 | 130.8, CH           | 7.46, d (8.0)                 | 129.9, CH             | 7.67, d (8.5)                 | 130.0, CH             | 7.67, d (8.5)                 |
| 3''      | 114.9, CH           | 6.80, d (8.5)                 | 115.4, CH           | 6.85, d (8.0)                 | 121.9, CH             | 7.25, d (8.5)                 | 121.9, CH             | 7.25, d (8.5)                 |
| 4''      | 156.2, C            |                               | 159.2, C            |                               | 150.1, C              |                               | 150.1, C              |                               |
| 5''      | 114.9, CH           | 6.80, d (8.5)                 | 115.4, CH           | 6.85, d (8.0)                 | 121.9, CH             | 7.25, d (8.5)                 | 121.9, CH             | 7.25, d (8.5)                 |
| 6''      | 129.9, CH           | 7.35, d (8.5)                 | 130.8, CH           | 7.46, d (8.0)                 | 129.9, CH             | 7.67, d (8.5)                 | 130.0, CH             | 7.67, d (8.5)                 |
| 3'-OMe   |                     |                               |                     |                               | 60.7, CH <sub>3</sub> | 3.39, s                       | 60.7, CH <sub>3</sub> | 3.39, s                       |
| 6'-OMe   |                     |                               |                     |                               | 56.1, CH <sub>3</sub> | 3.76, s                       | 56.1, CH <sub>3</sub> | 3.79, s                       |

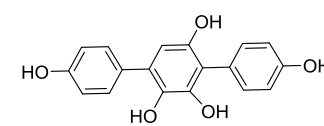**17**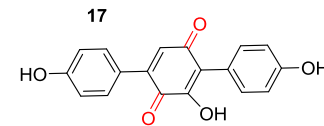**20**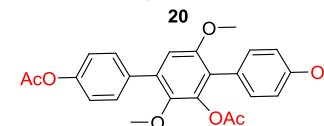**23**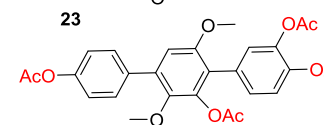**24**

<sup>a</sup> The  $^1\text{H}$  and  $^{13}\text{C}$  NMR Data for three acetoxy were  $\delta_{\text{H}}$  2.02 (s, 3H), 2.29 (s, 3H), 2.30 (s, 3H), and  $\delta_{\text{C}}$  168.7 (C), 169.3  $\times$ 2 (C), 20.1 (CH<sub>3</sub>), 20.9  $\times$ 2 (CH<sub>3</sub>), respectively.

<sup>b</sup> The  $^1\text{H}$  and  $^{13}\text{C}$  NMR Data for four acetoxy were  $\delta_{\text{H}}$  2.05 (s, 3H), 2.30 (s, 3H), 2.31 (s, 6H), and  $\delta_{\text{C}}$  168.4  $\times$ 2 (C), 168.7 (C), 169.3 (C), 20.0 (CH<sub>3</sub>), 20.4  $\times$ 2 (CH<sub>3</sub>), 20.9 (CH<sub>3</sub>), respectively.

**Figure S1.** Phylogenetic tree of ITS sequence for *Aspergillus* sp. GZWMJZ-055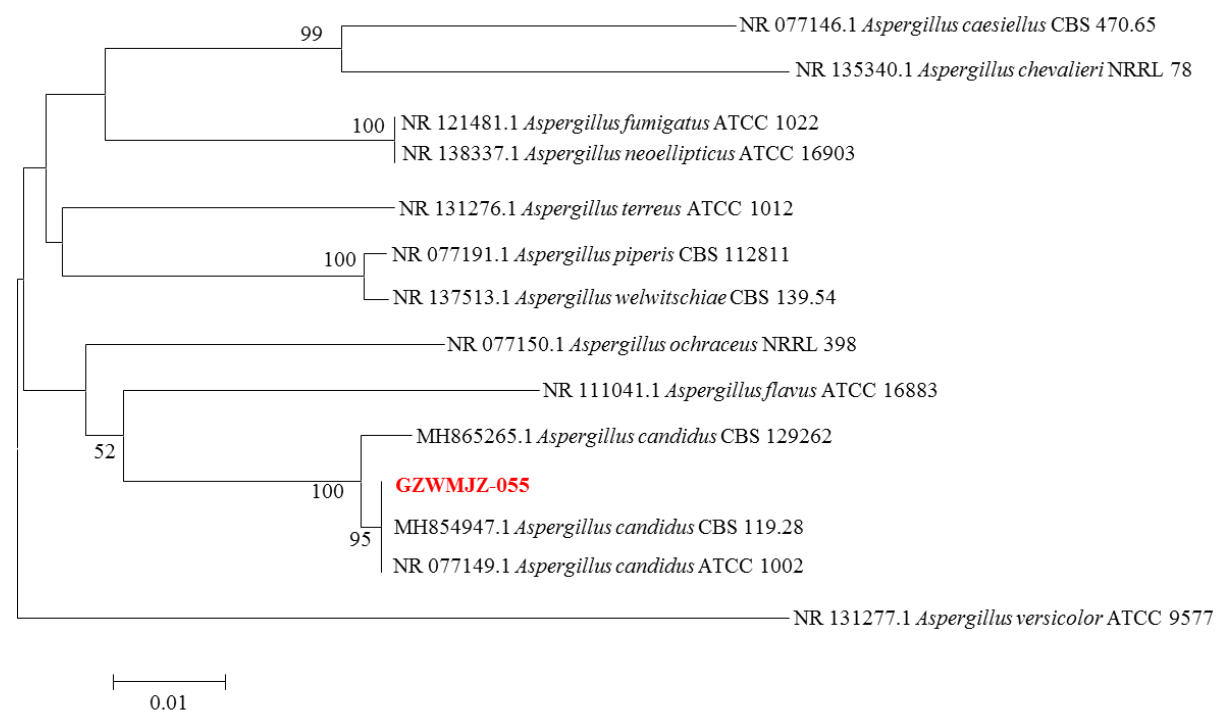**Figure S2.** HRESIMS spectrum of compound **1**

DZ-22 #237 RT: 0.57 AV: 1 NL: 2.55E8  
T: FTMS +p ESI Full ms [160.0000-1200.0000]

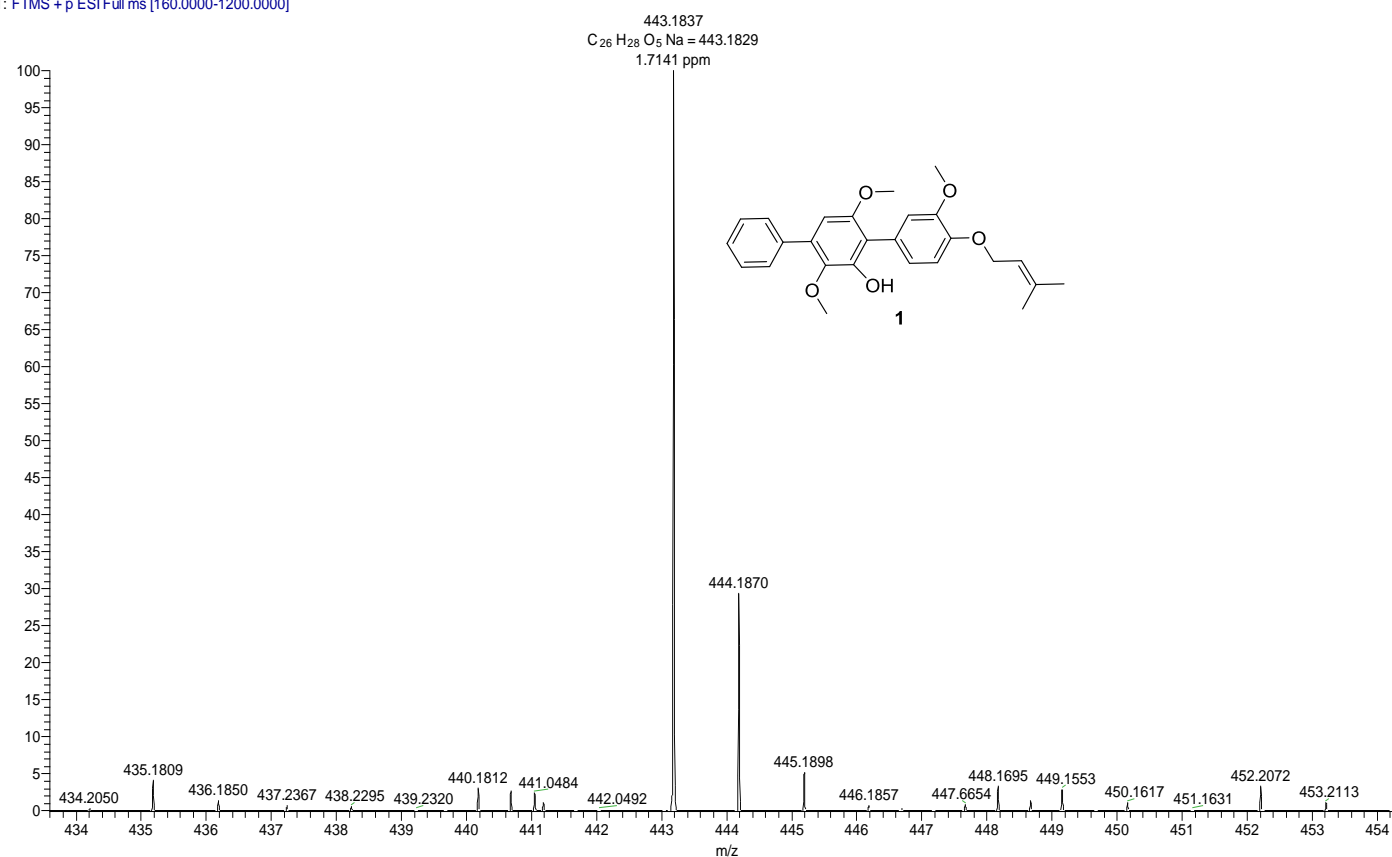

**Figure S3.**  $^1\text{H-NMR}$  spectrum of compound **1** in  $\text{DMSO-}d_6$

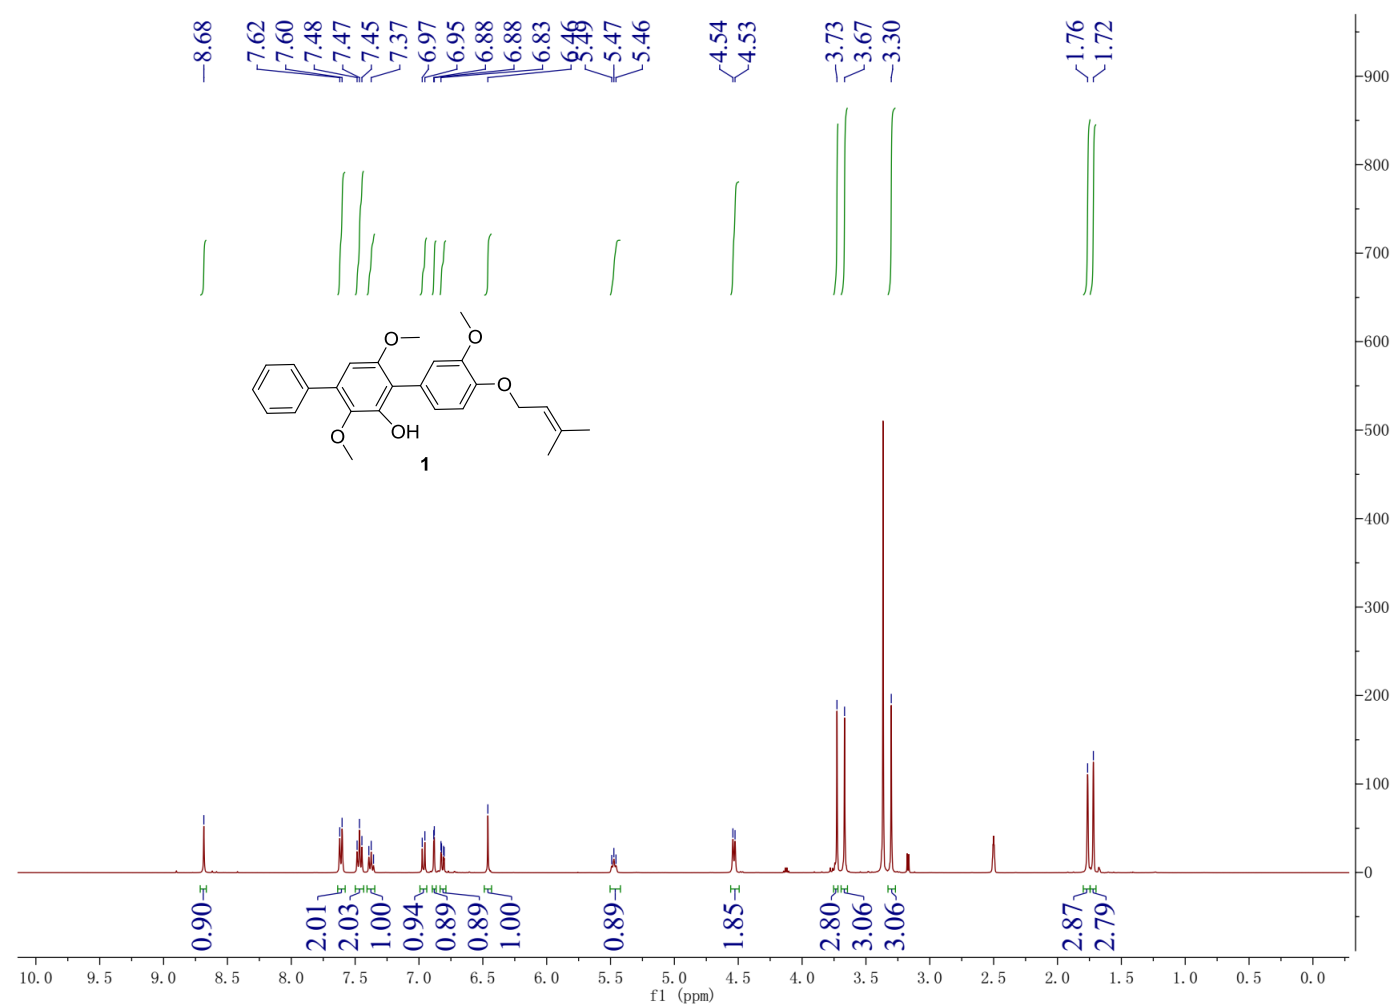

**Figure S4.**  $^{13}\text{C-NMR}$  spectrum of compound **1** in  $\text{DMSO-}d_6$

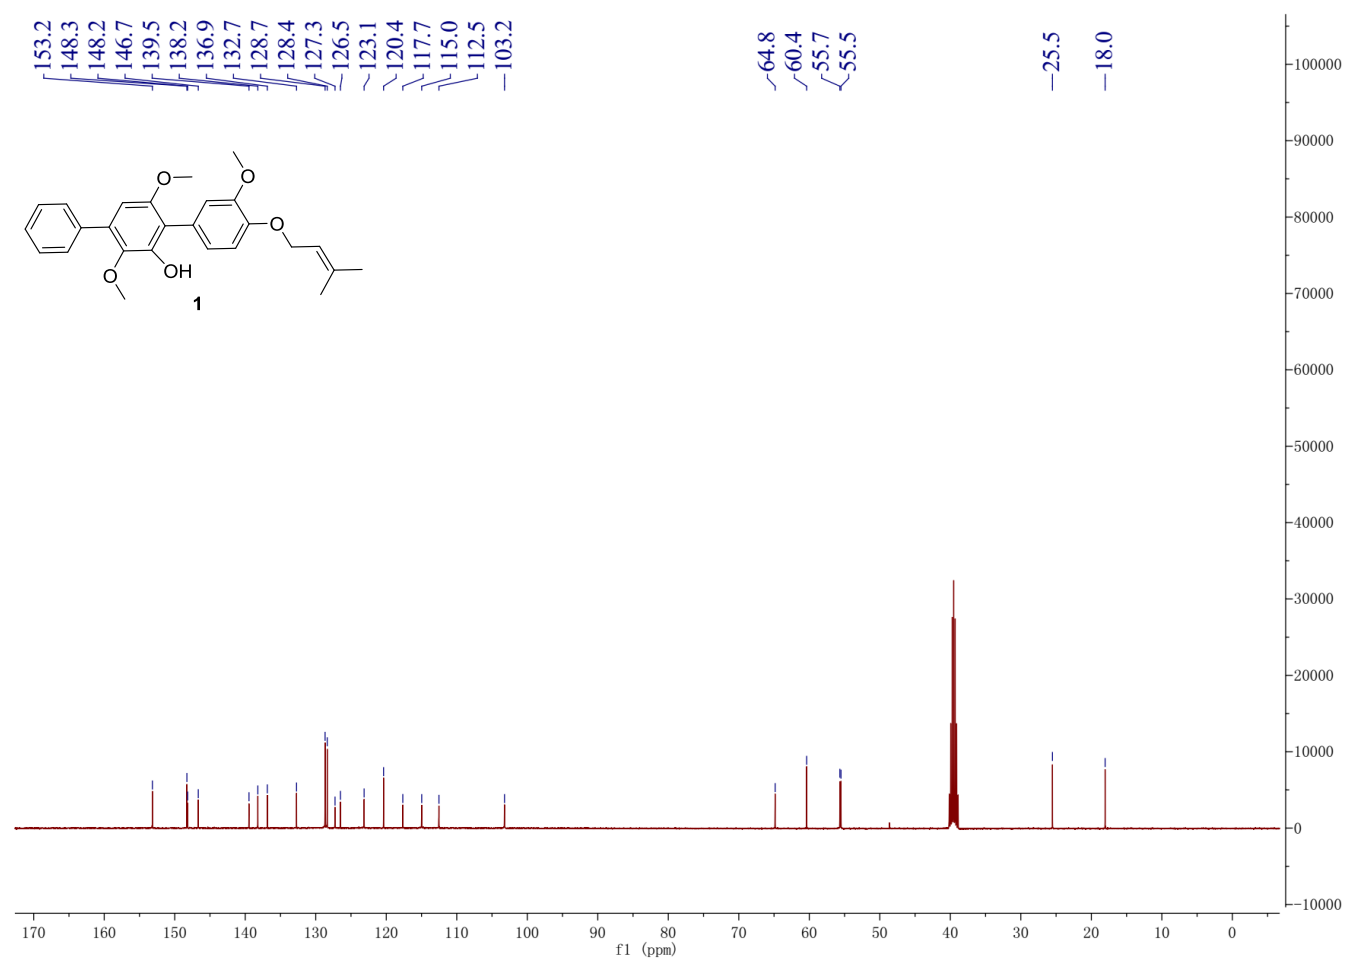

**Figure S5.** HMQC spectrum of compound **1** in DMSO-*d*<sub>6</sub>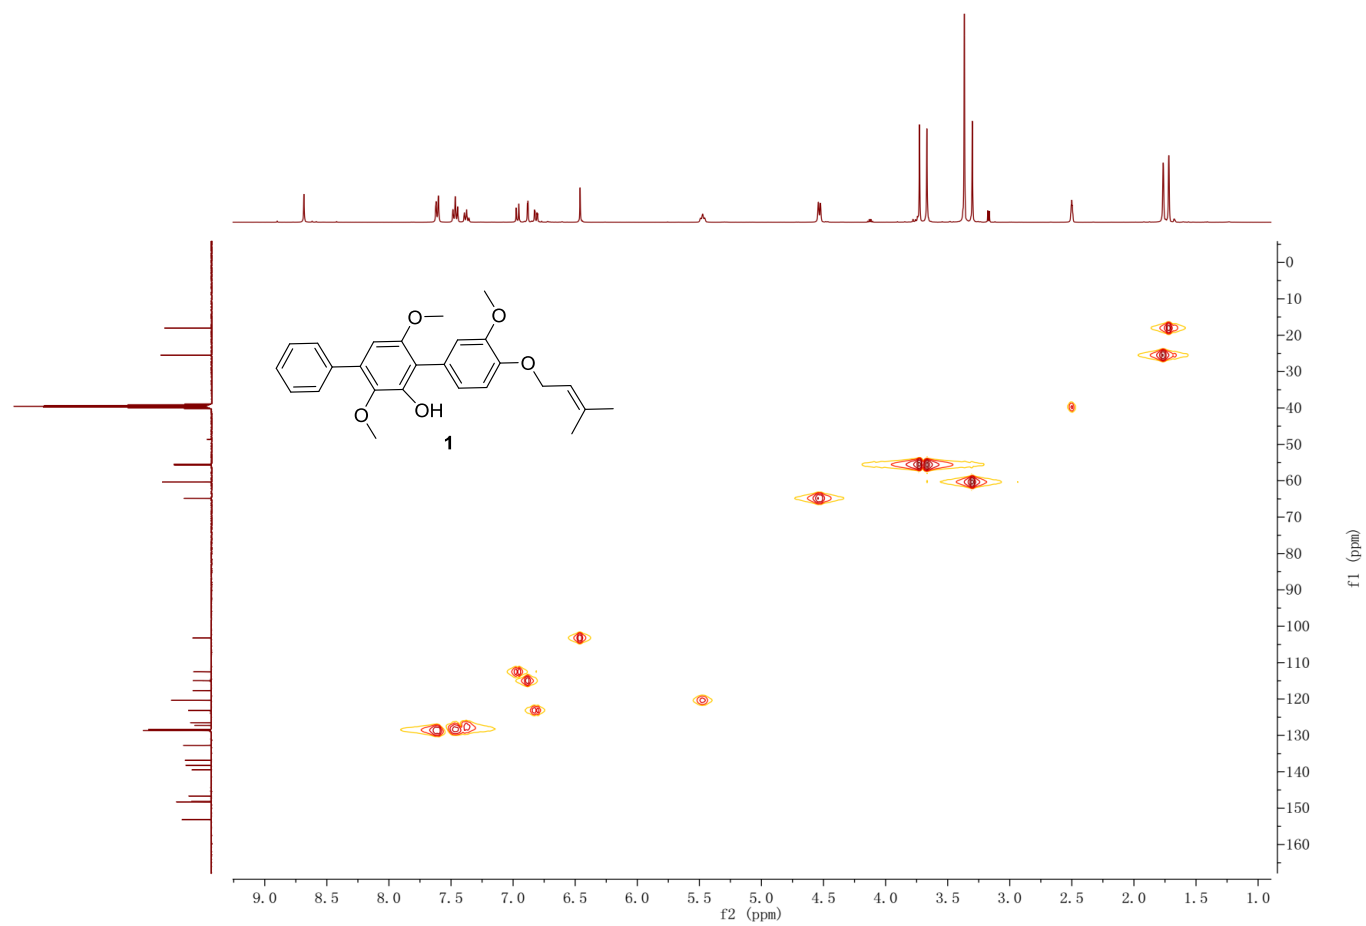**Figure S6.** <sup>1</sup>H-<sup>1</sup>H COSY spectrum of compound **1** in DMSO-*d*<sub>6</sub>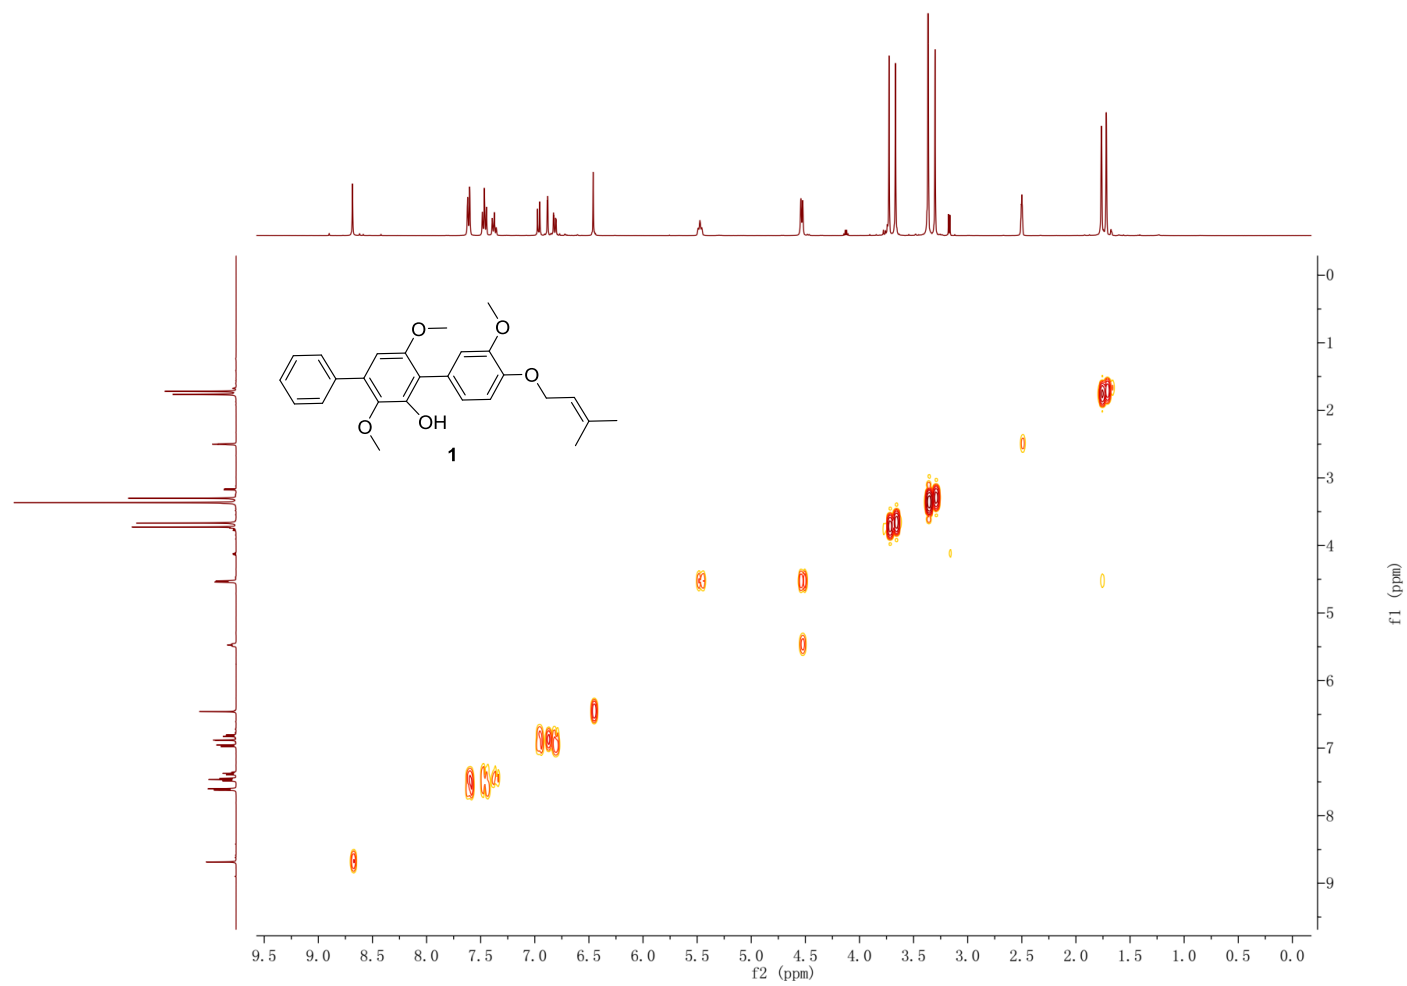



**Figure S7.** HMBC spectrum of compound **1** in DMSO-*d*<sub>6</sub>

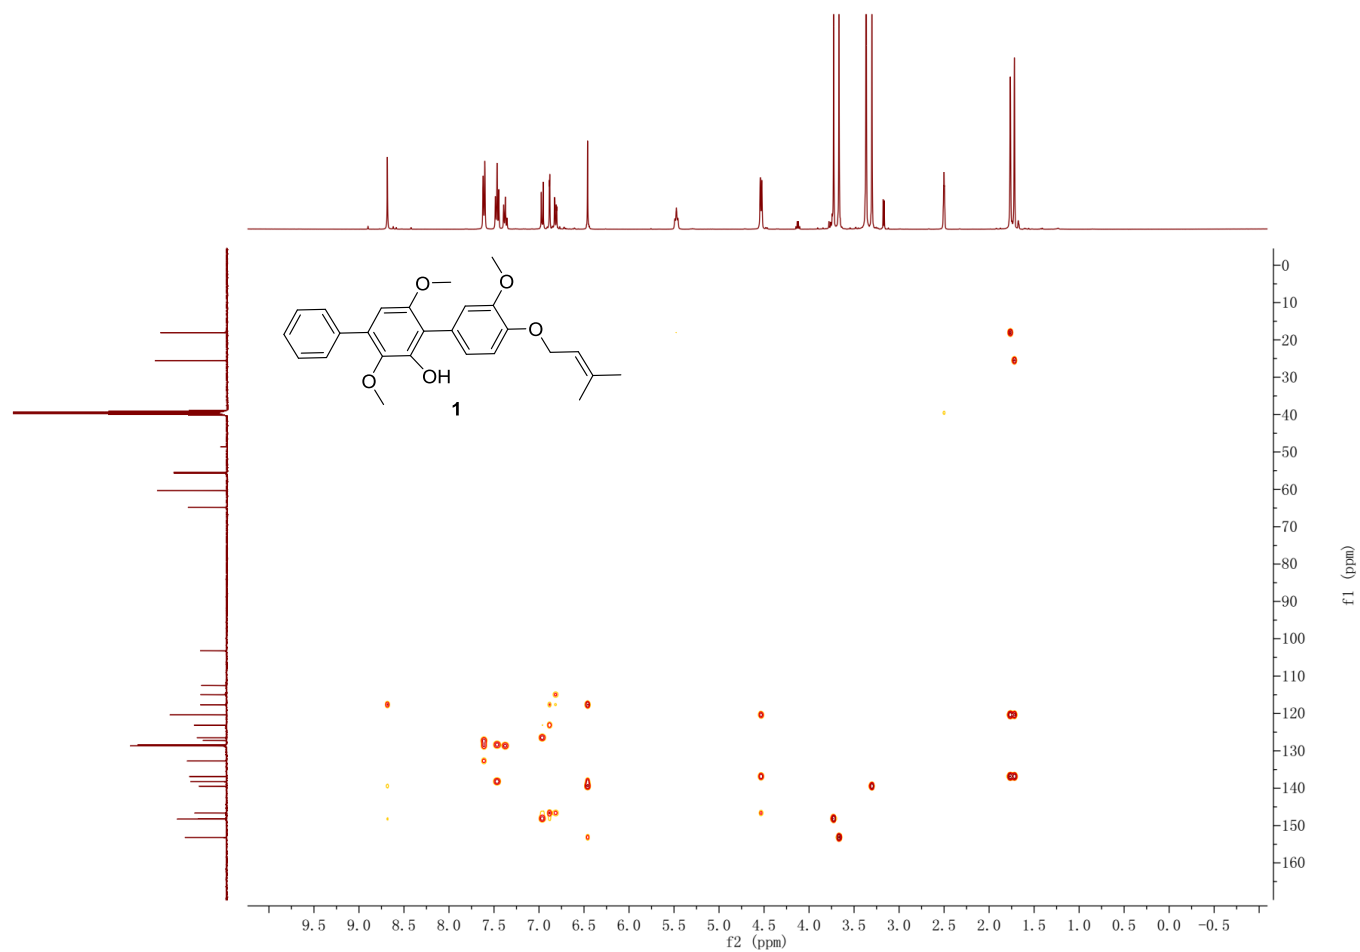

**Figure S8.** <sup>1</sup>H-NMR spectrum of synthesized **15** in DMSO-*d*<sub>6</sub>

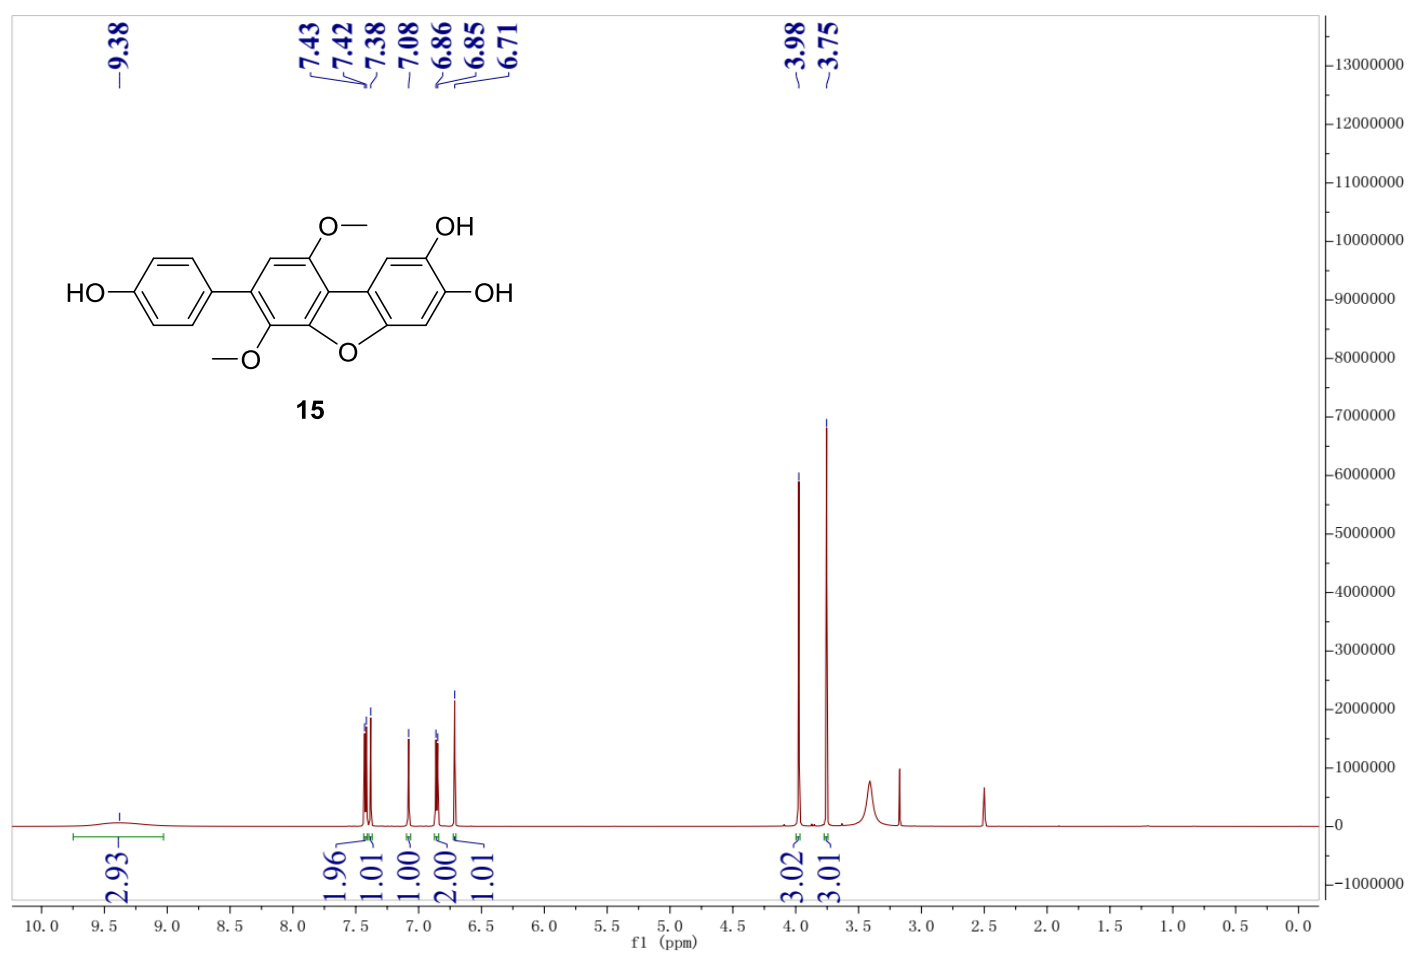

**Figure S9.**  $^{13}\text{C}$ -NMR spectrum of synthesized **15** in  $\text{DMSO-}d_6$ 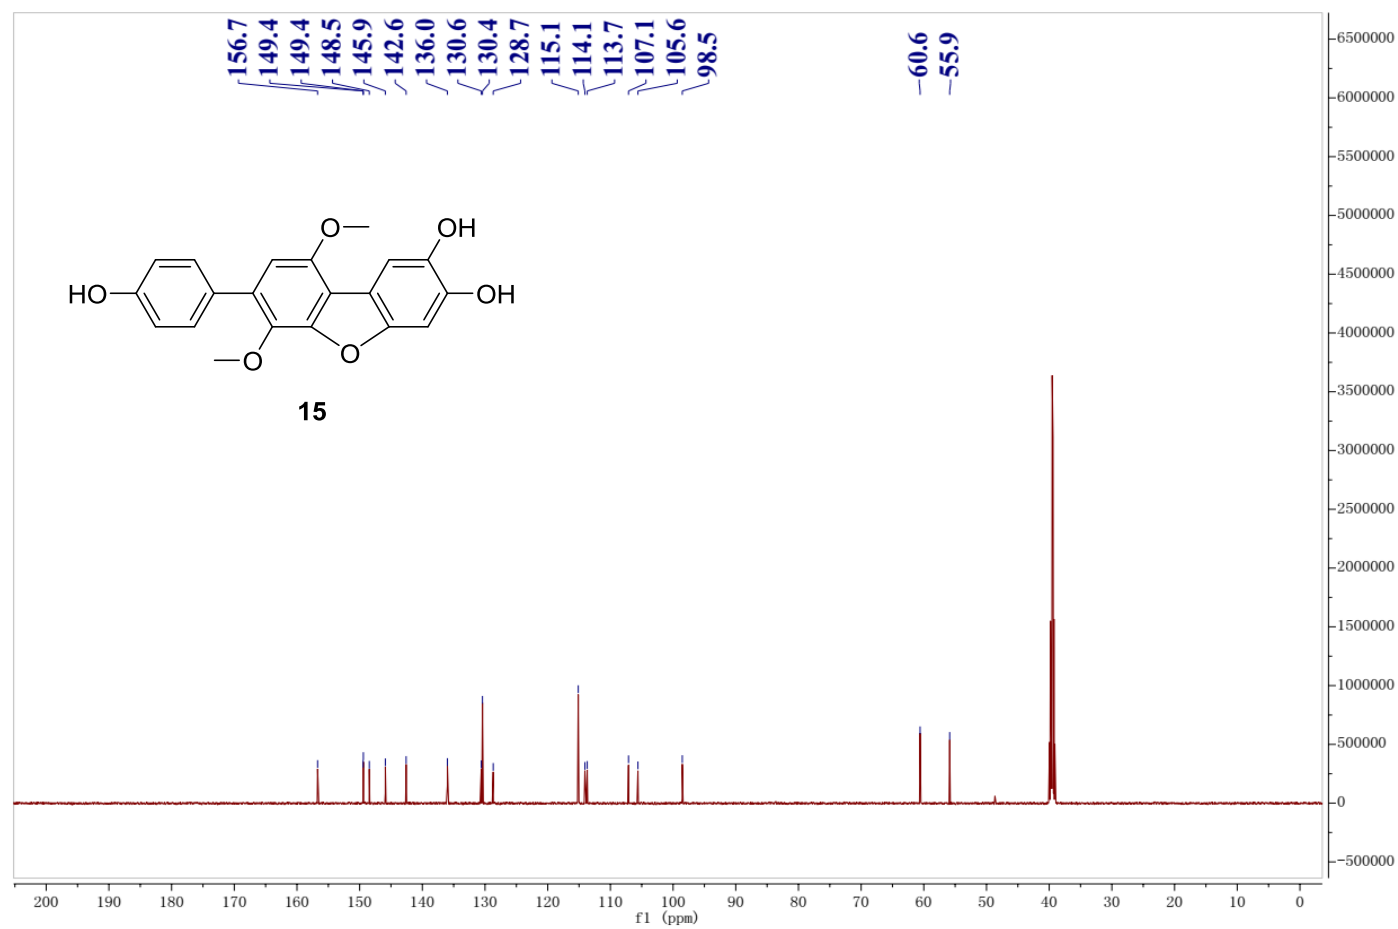**Figure S10.**  $^1\text{H}$ -NMR spectrum of synthesized **16** in  $\text{DMSO-}d_6$ 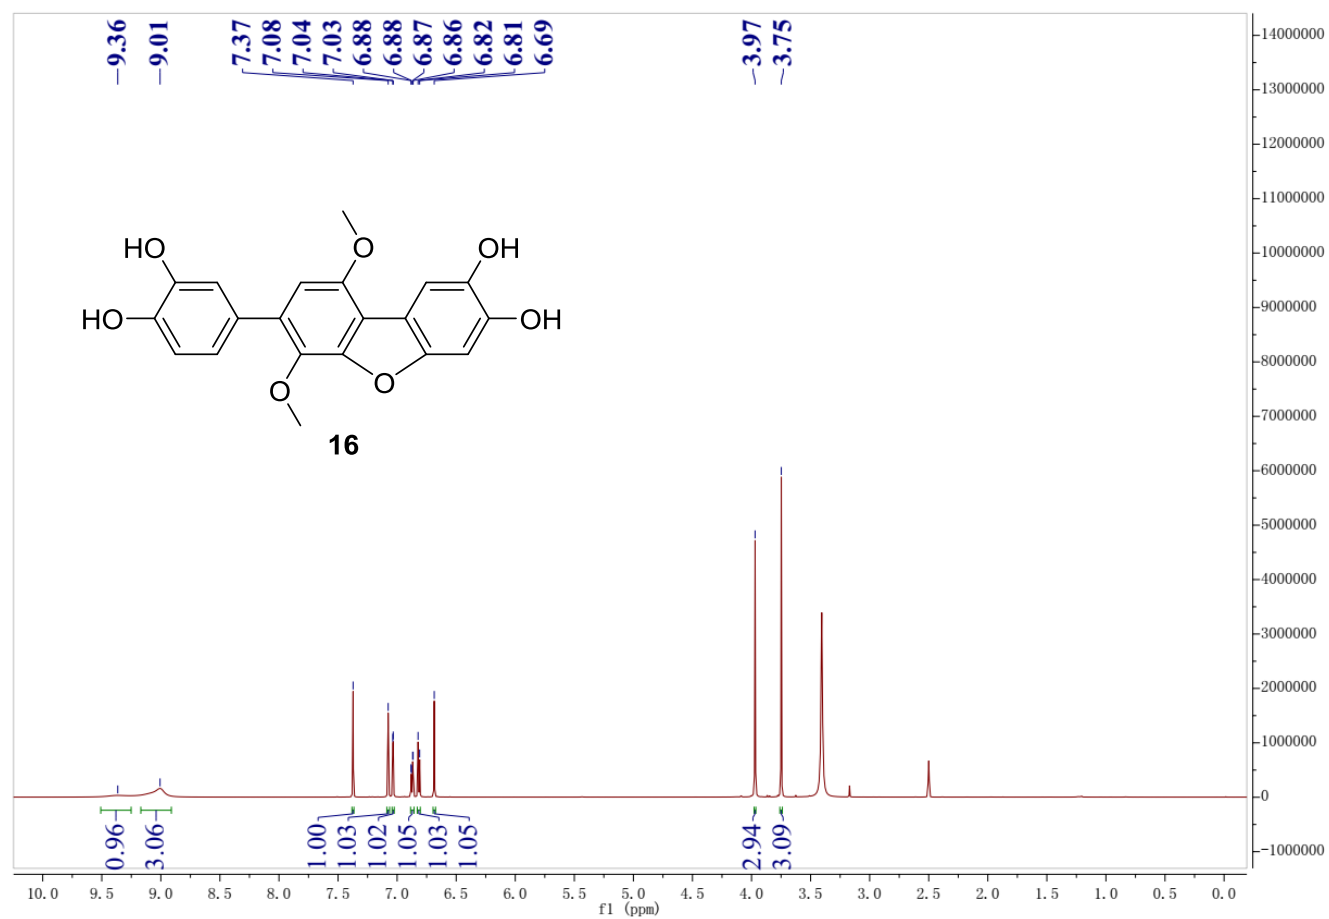

**Figure S11.**  $^{13}\text{C}$ -NMR spectrum of synthesized **16** in  $\text{DMSO-}d_6$

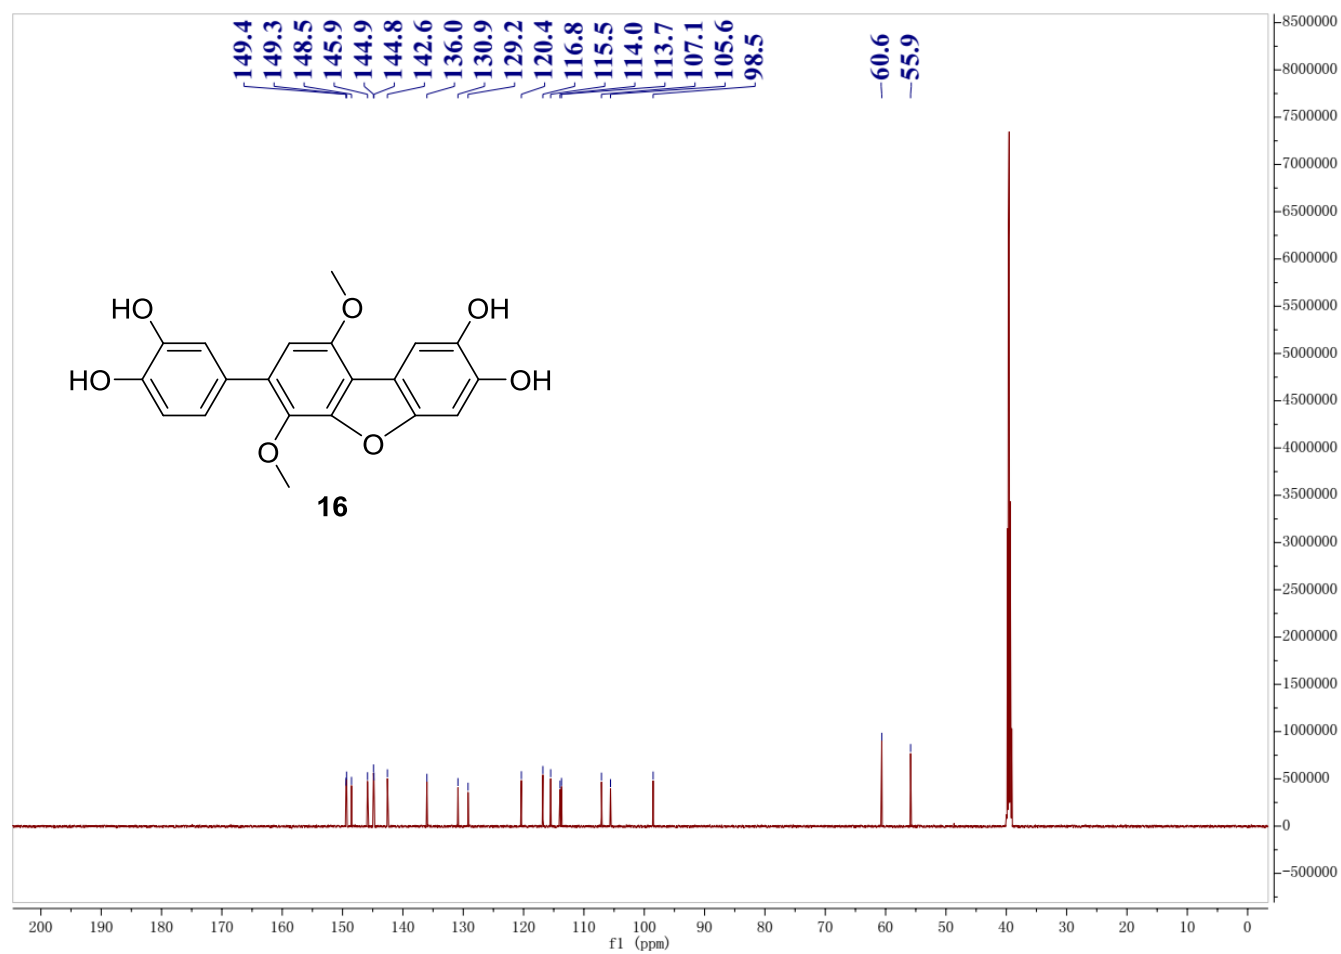

**Figure S12.**  $^1\text{H}$ -NMR spectrum of compound **17** in  $\text{DMSO-}d_6$

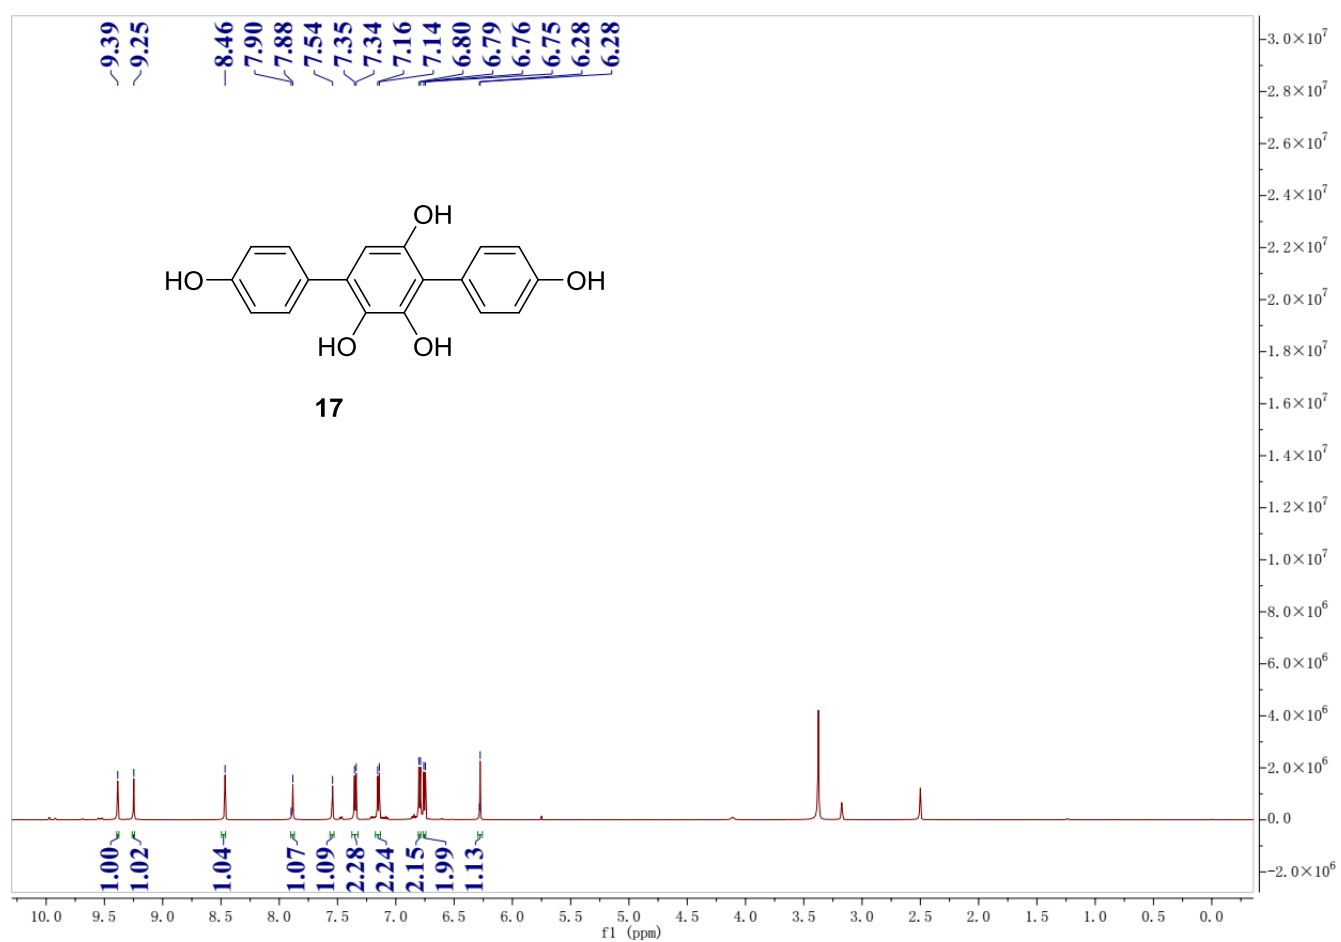

**Figure S13.**  $^{13}\text{C}$ -NMR spectrum of compound **17** in  $\text{DMSO-}d_6$ 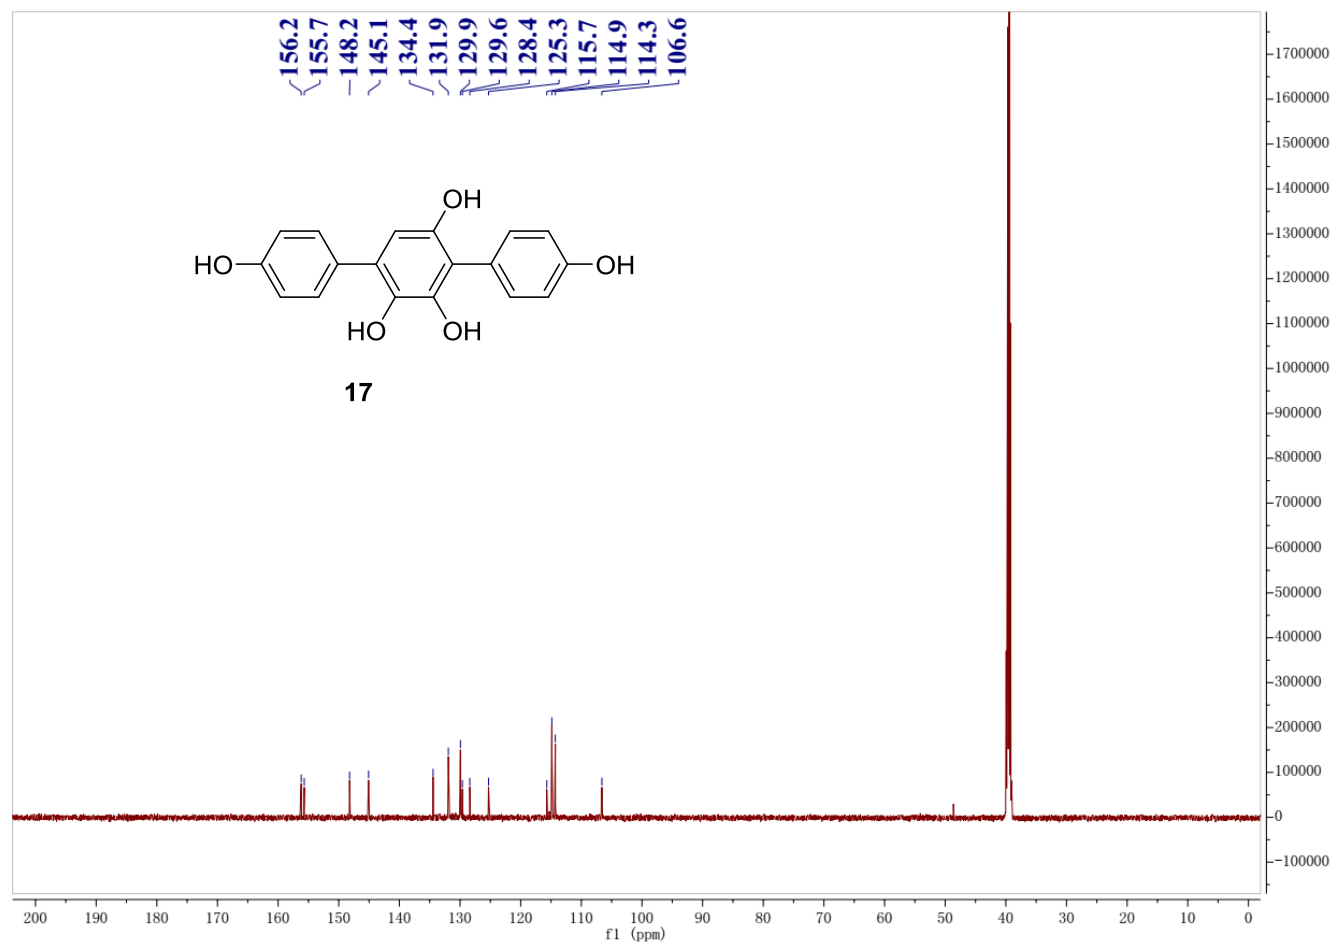**Figure S14.** HRESIMS spectrum of compound **18**

DZ68-8-2-F\_201014093119 #8 RT: 0.04 AV: 1 NL: 3.69E7  
T: FTMS - p ESI Full ms [166.7000-2500.0000]

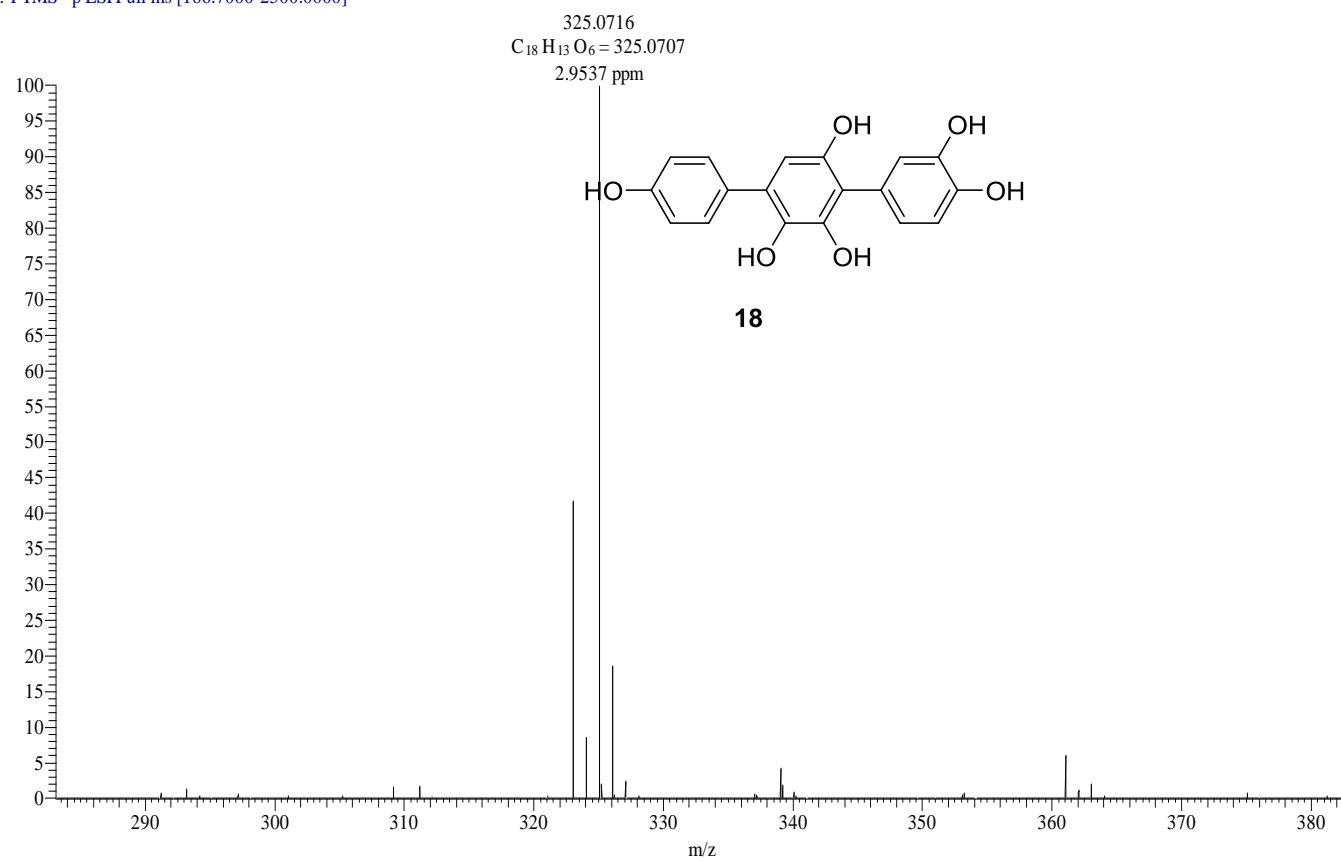

**Figure S15.**  $^1\text{H-NMR}$  spectrum of compound **18** in  $\text{DMSO-}d_6$

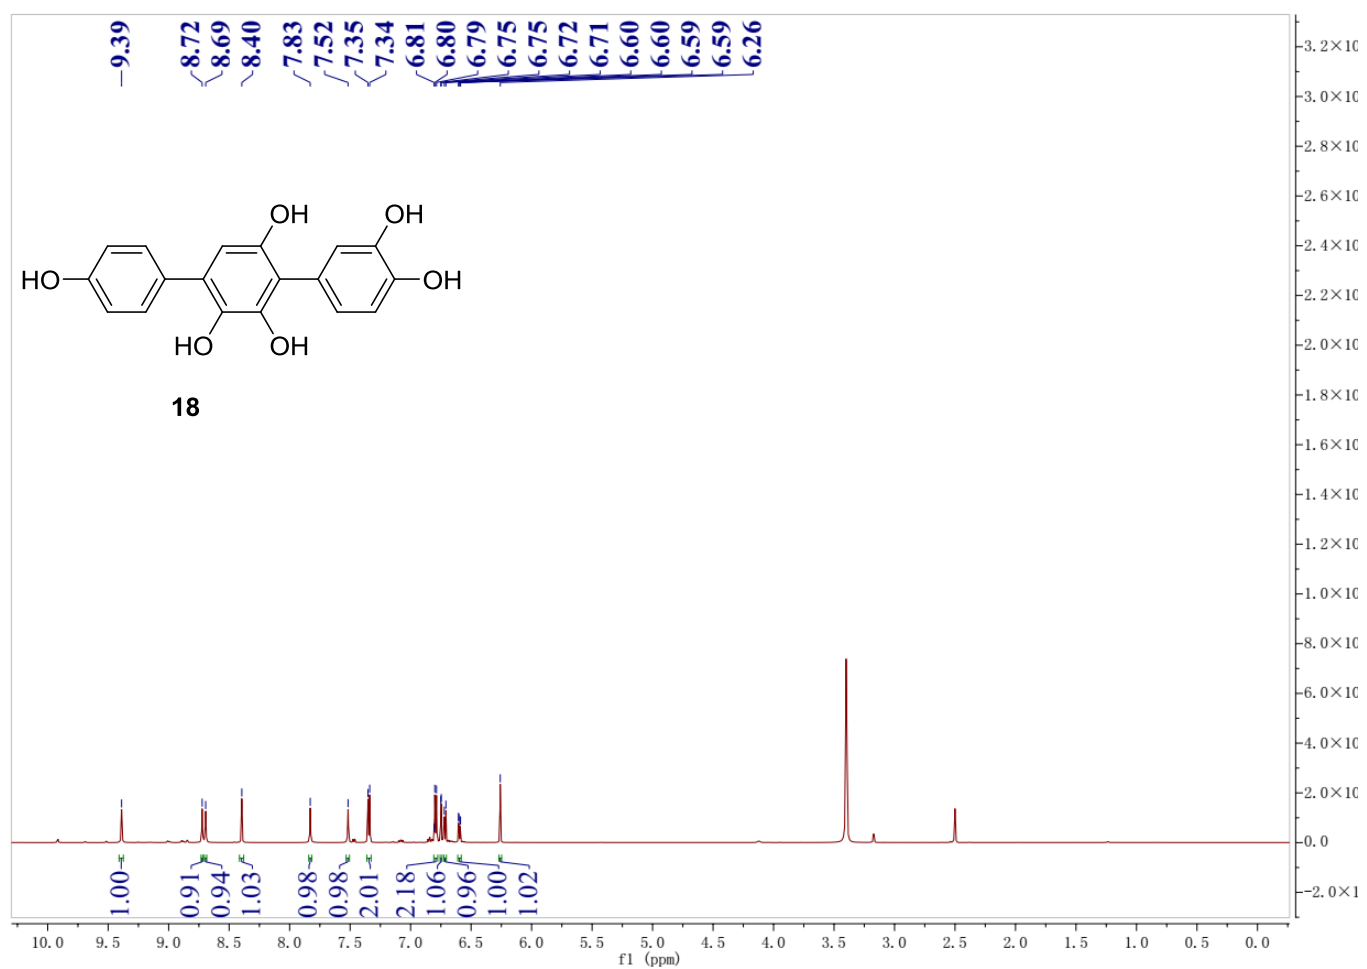

**Figure S16.**  $^{13}\text{C-NMR}$  spectrum of compound **18** in  $\text{DMSO-}d_6$

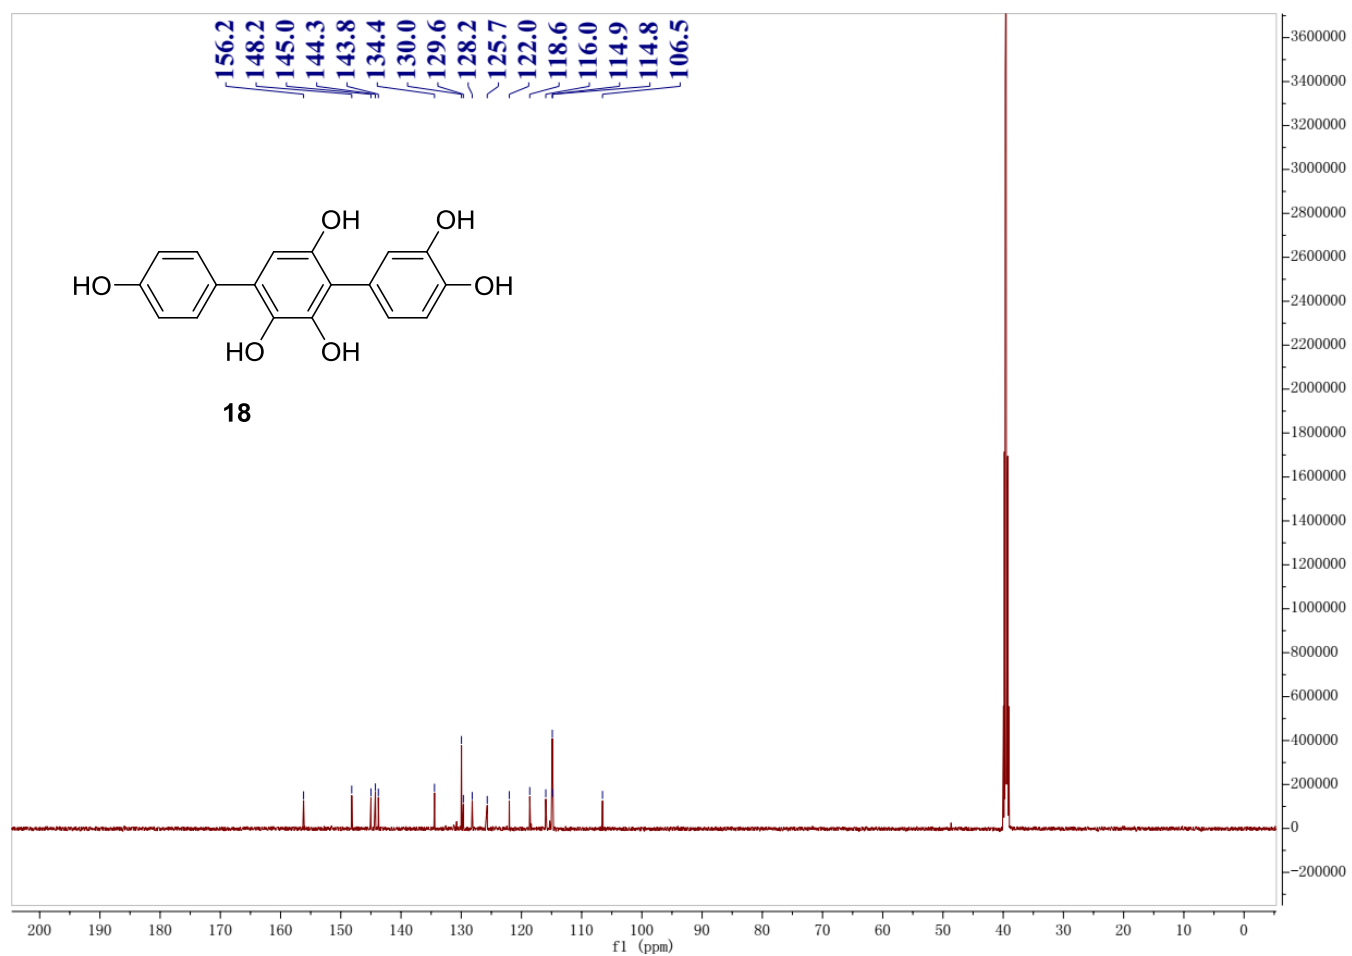

**Figure S17.** HRESIMS spectrum of compound **19**

DZ68-7-3-A\_201013152359 #24 RT: 0.11 AV: 1 NL: 9.44E5  
T: FTMS + p ESI Full ms [120.0000-1600.0000]

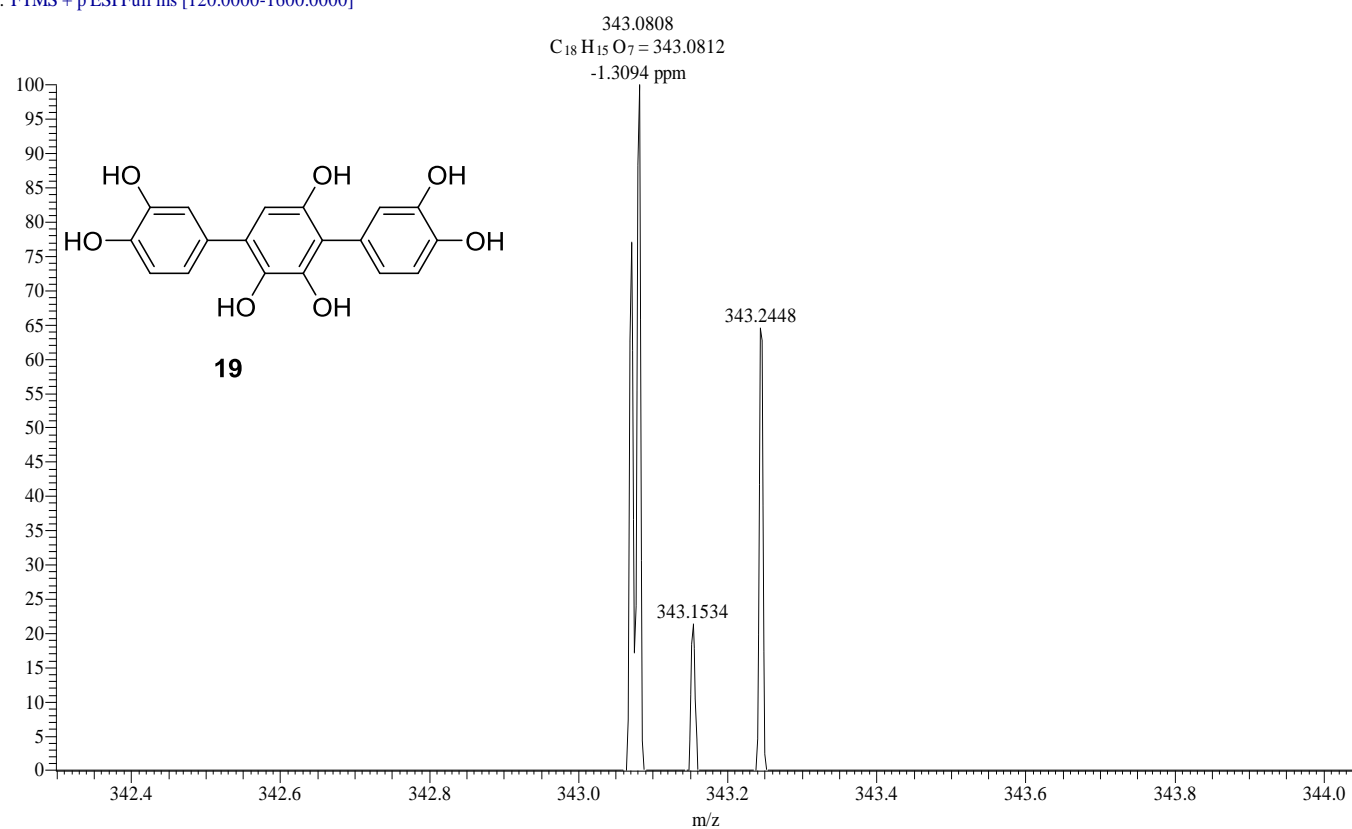**Figure S18.** <sup>1</sup>H-NMR spectrum of compound **19** in DMSO-*d*<sub>6</sub>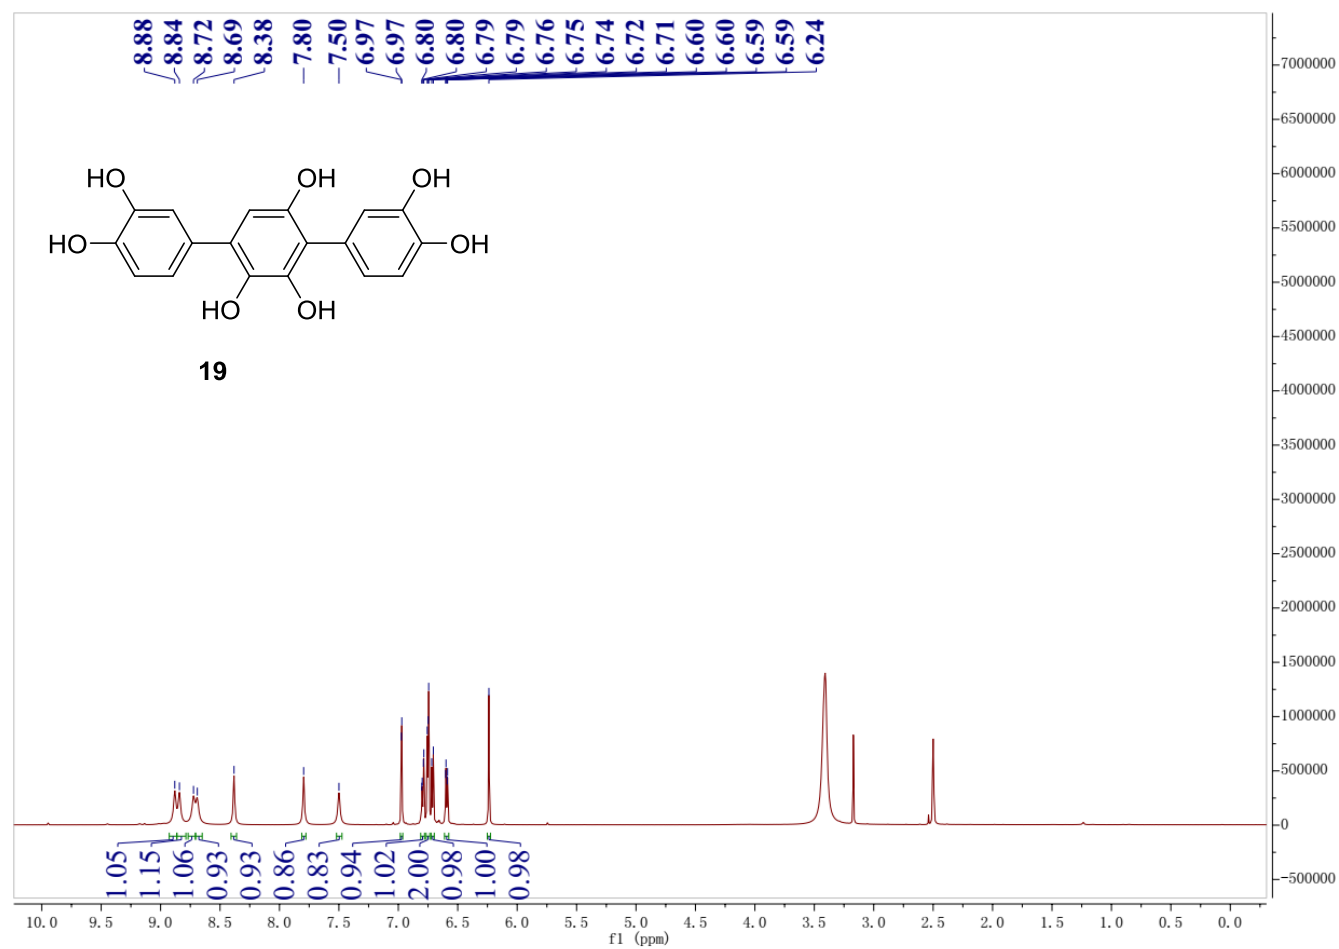

**Figure S19.**  $^{13}\text{C}$ -NMR spectrum of compound **19** in  $\text{DMSO-}d_6$

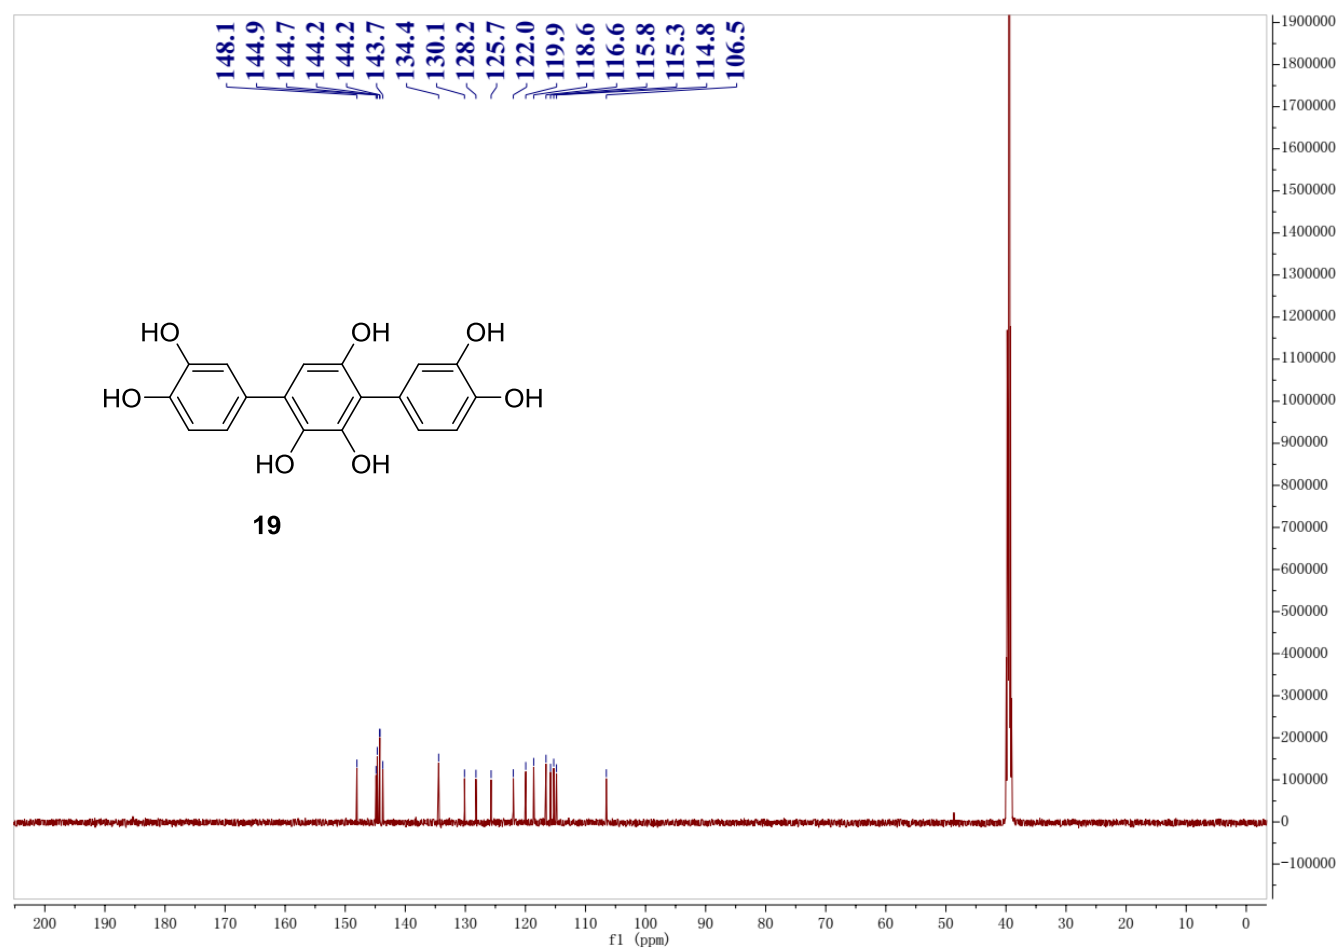

**Figure S20.**  $^1\text{H}$ -NMR spectrum of compound **20** in  $\text{DMSO-}d_6$

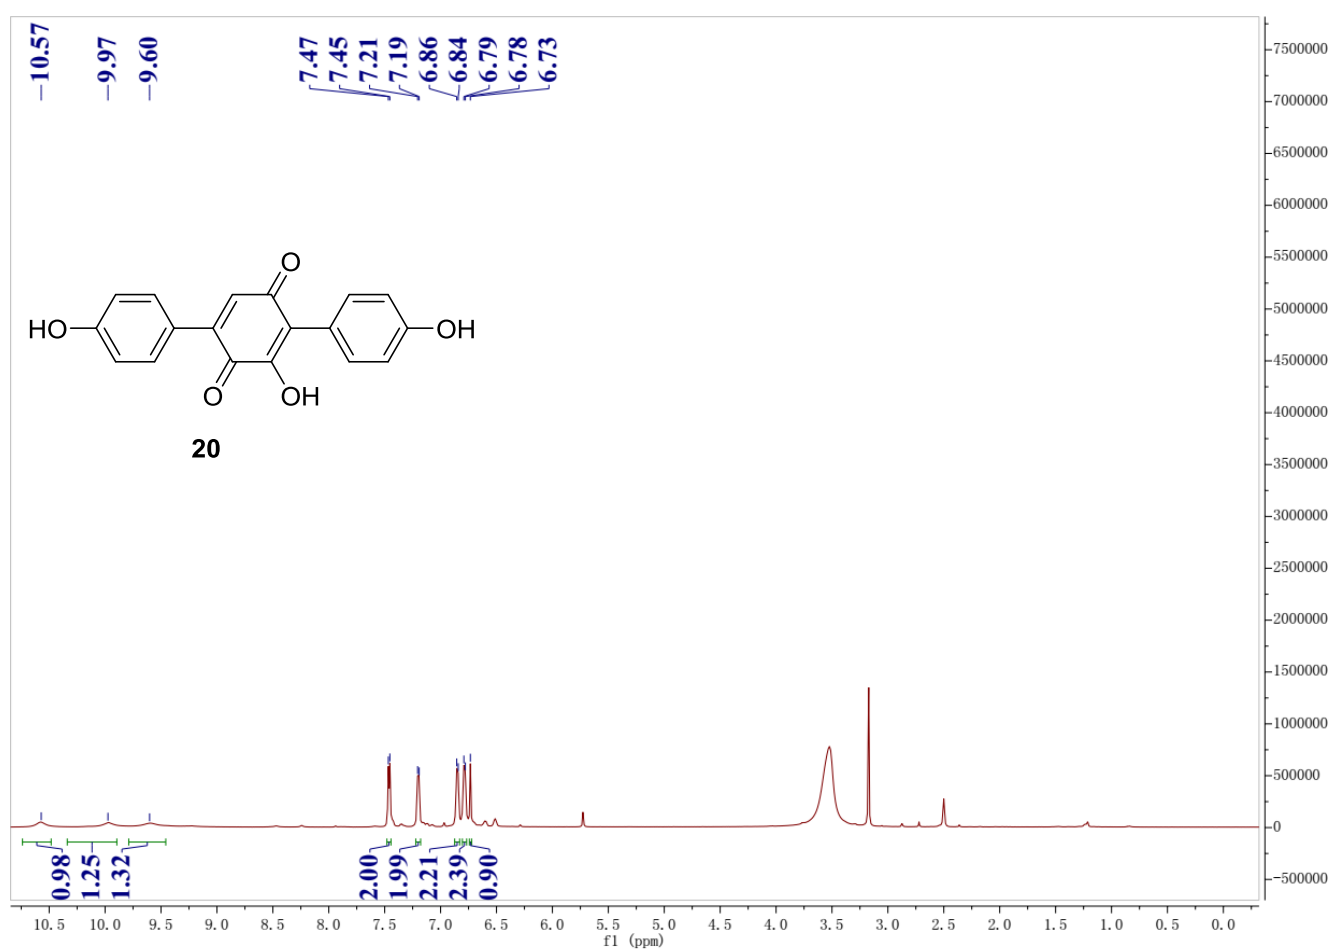

**Figure S21.**  $^{13}\text{C}$ -NMR spectrum of compound **20** in  $\text{DMSO-}d_6$ 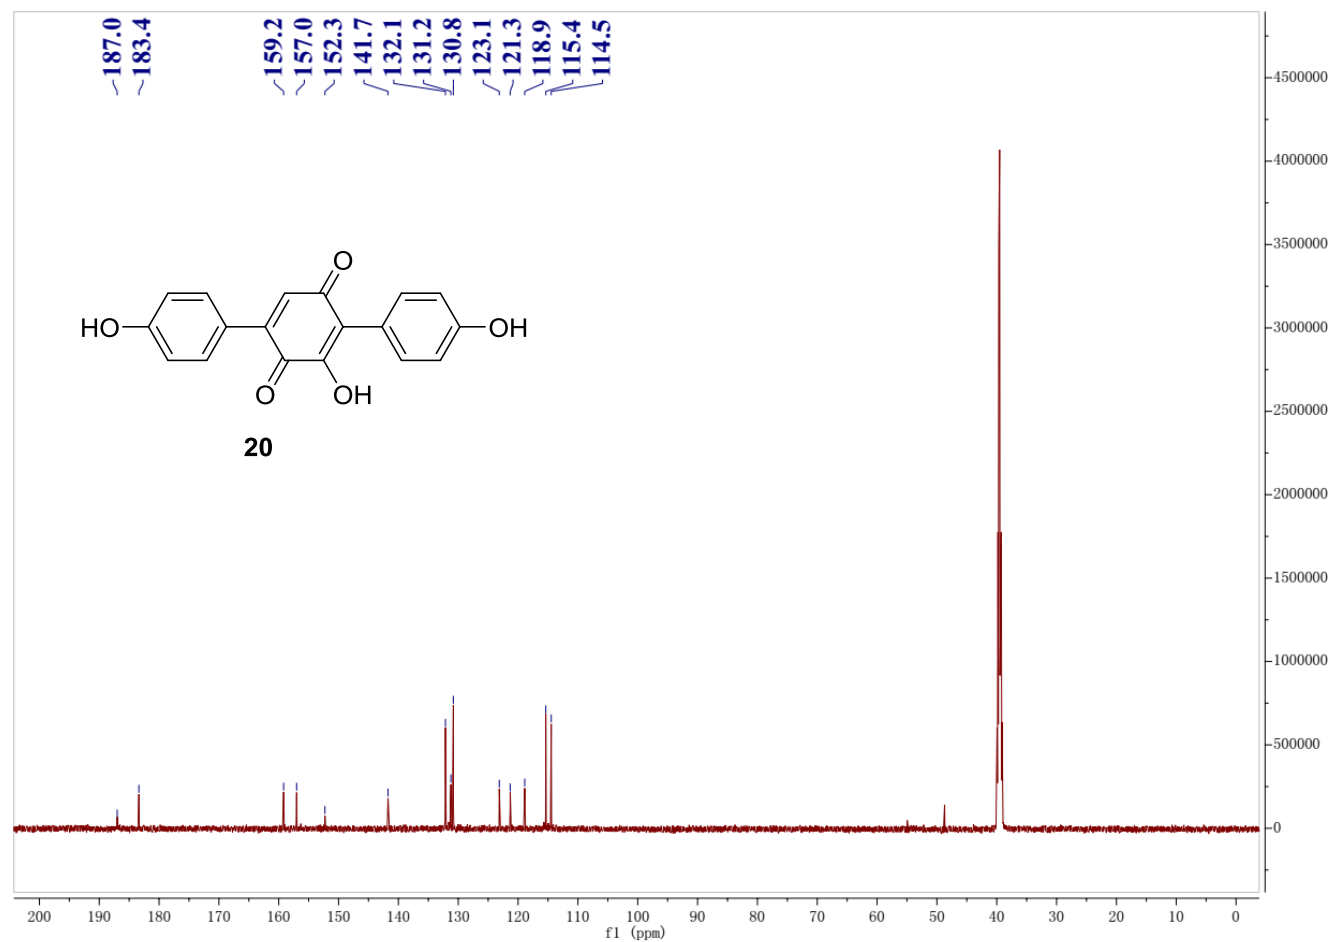**Figure S22.** HRESIMS spectrum of compound **21**

DZ68-8-2-A #32 RT: 0.14 AV: 1 NL: 1.01E8  
T: FTMS + p ESI Full ms [120.0000-1600.0000]

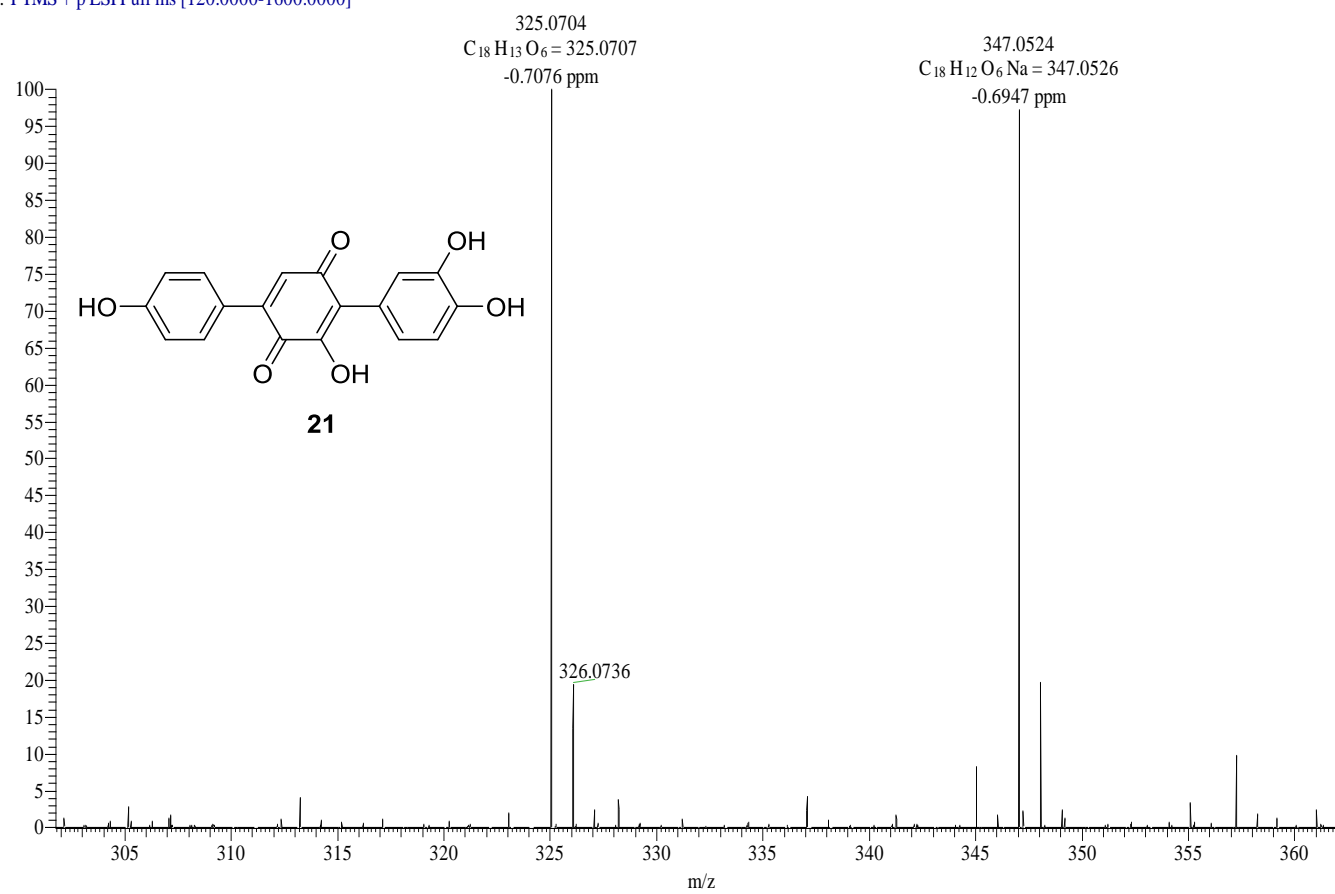



**Figure S23.**  $^1\text{H-NMR}$  spectrum of compound **21** in  $\text{DMSO-}d_6$

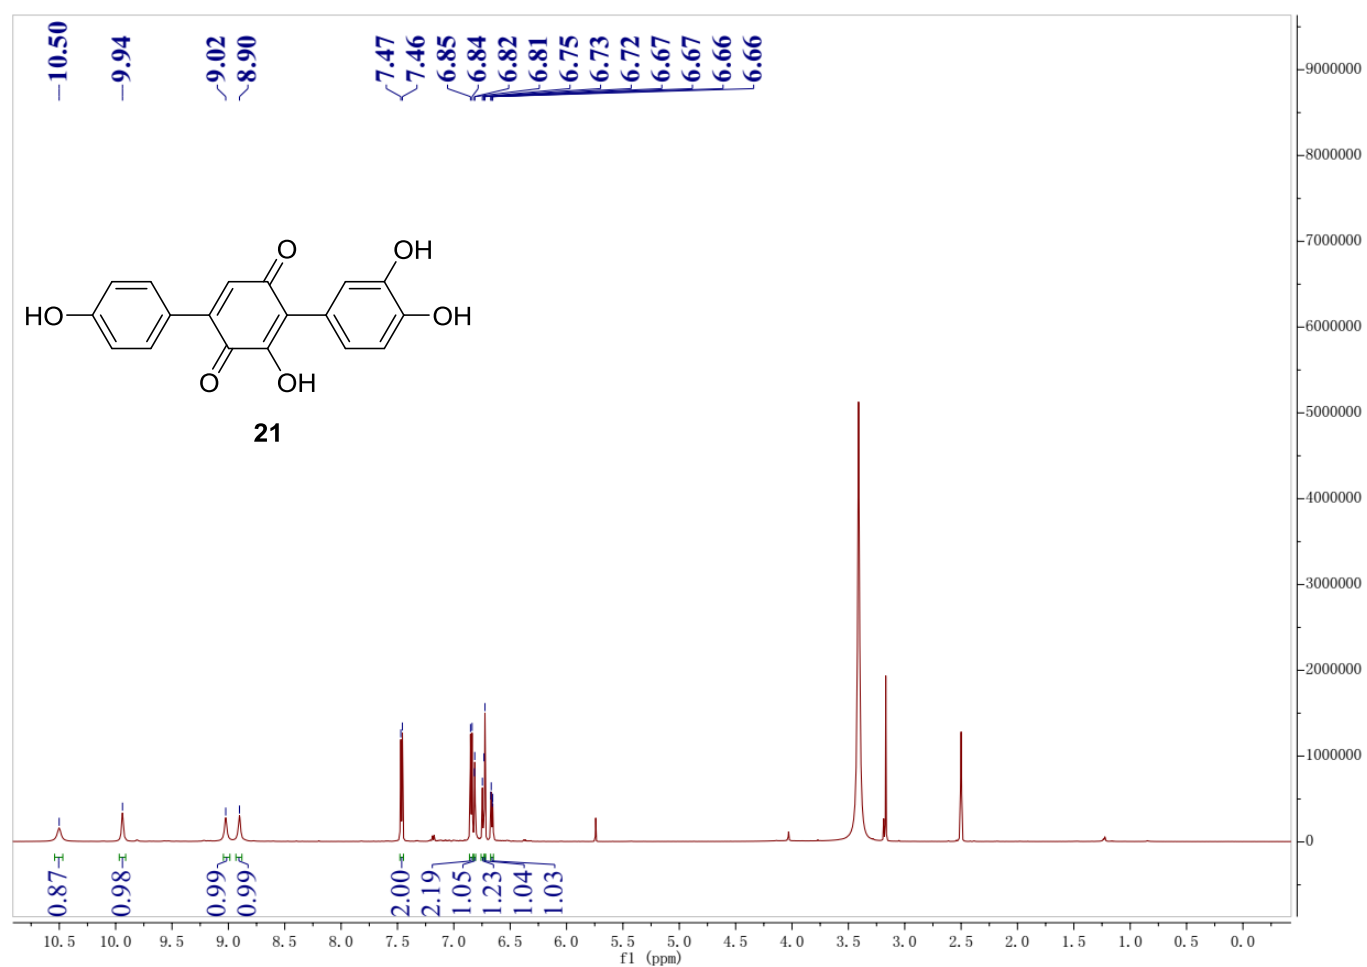

**Figure S24.**  $^{13}\text{C-NMR}$  spectrum of compound **21** in  $\text{DMSO-}d_6$

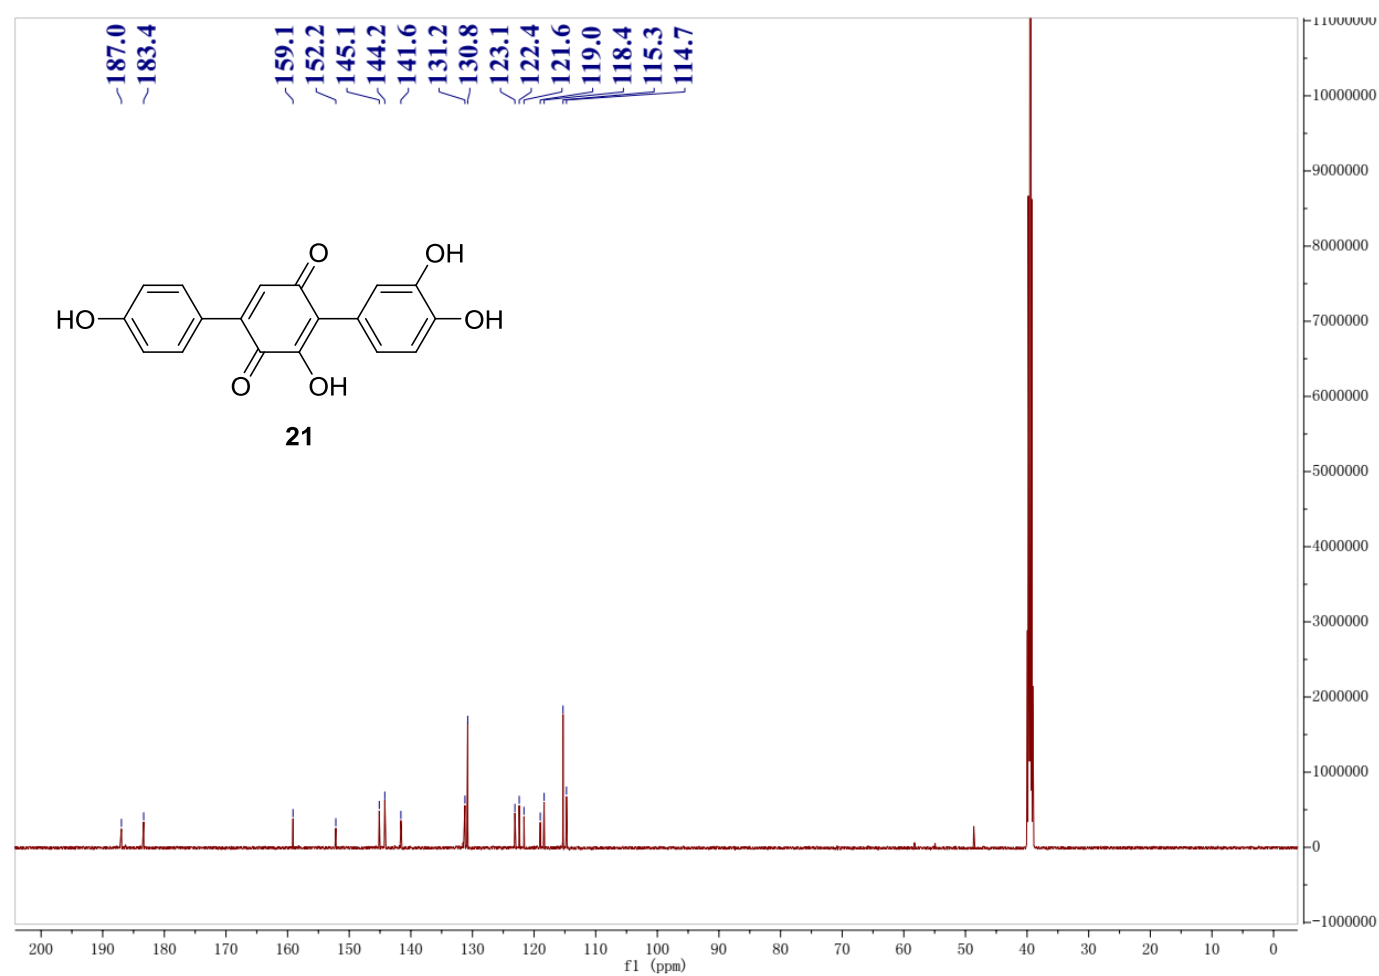

**Figure S25.** HRESIMS spectrum of compound **22**

DZ68-7-3-B #27 RT: 0.12 AV: 1 NL: 8.76E7  
T: FTMS + p ESI Full ms [120.0000-1600.0000]

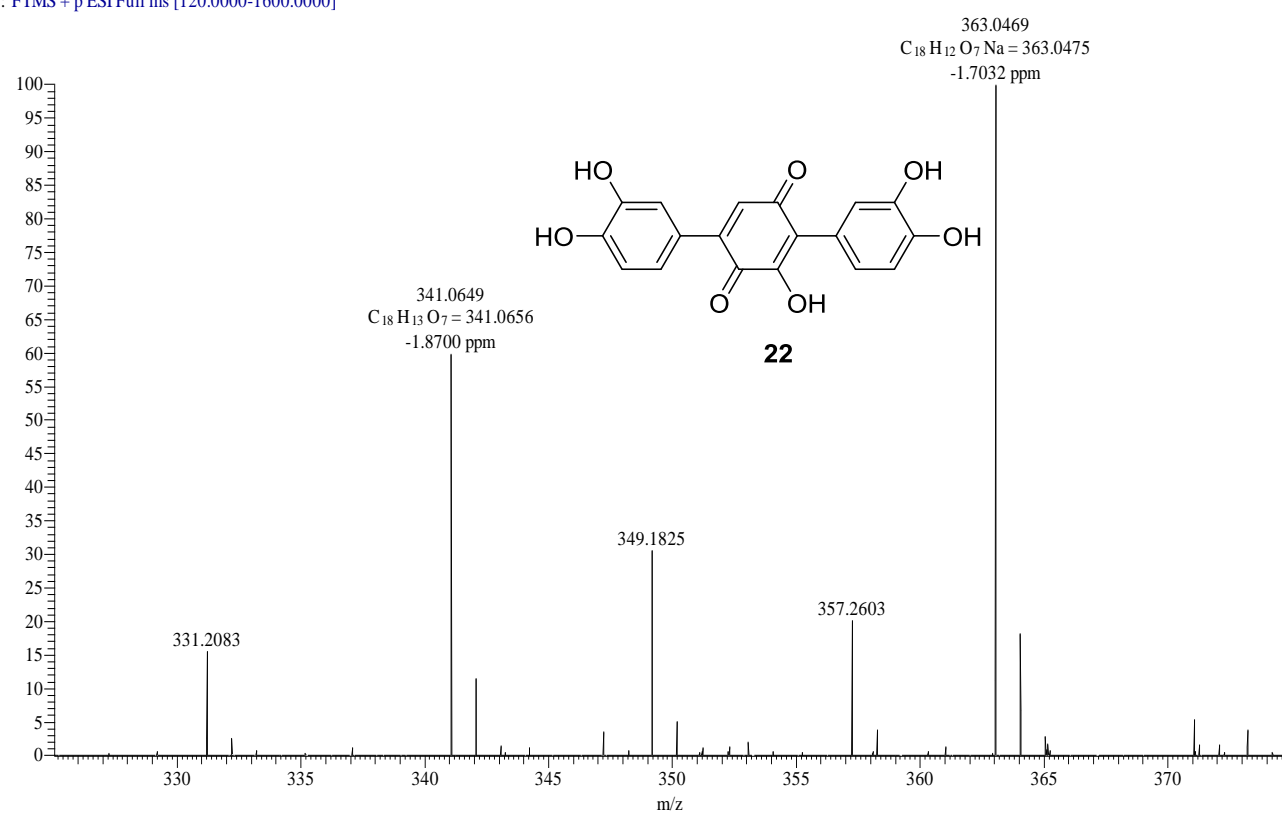**Figure S26.**  $^1\text{H-NMR}$  spectrum of compound **22** in  $\text{DMSO-}d_6$ 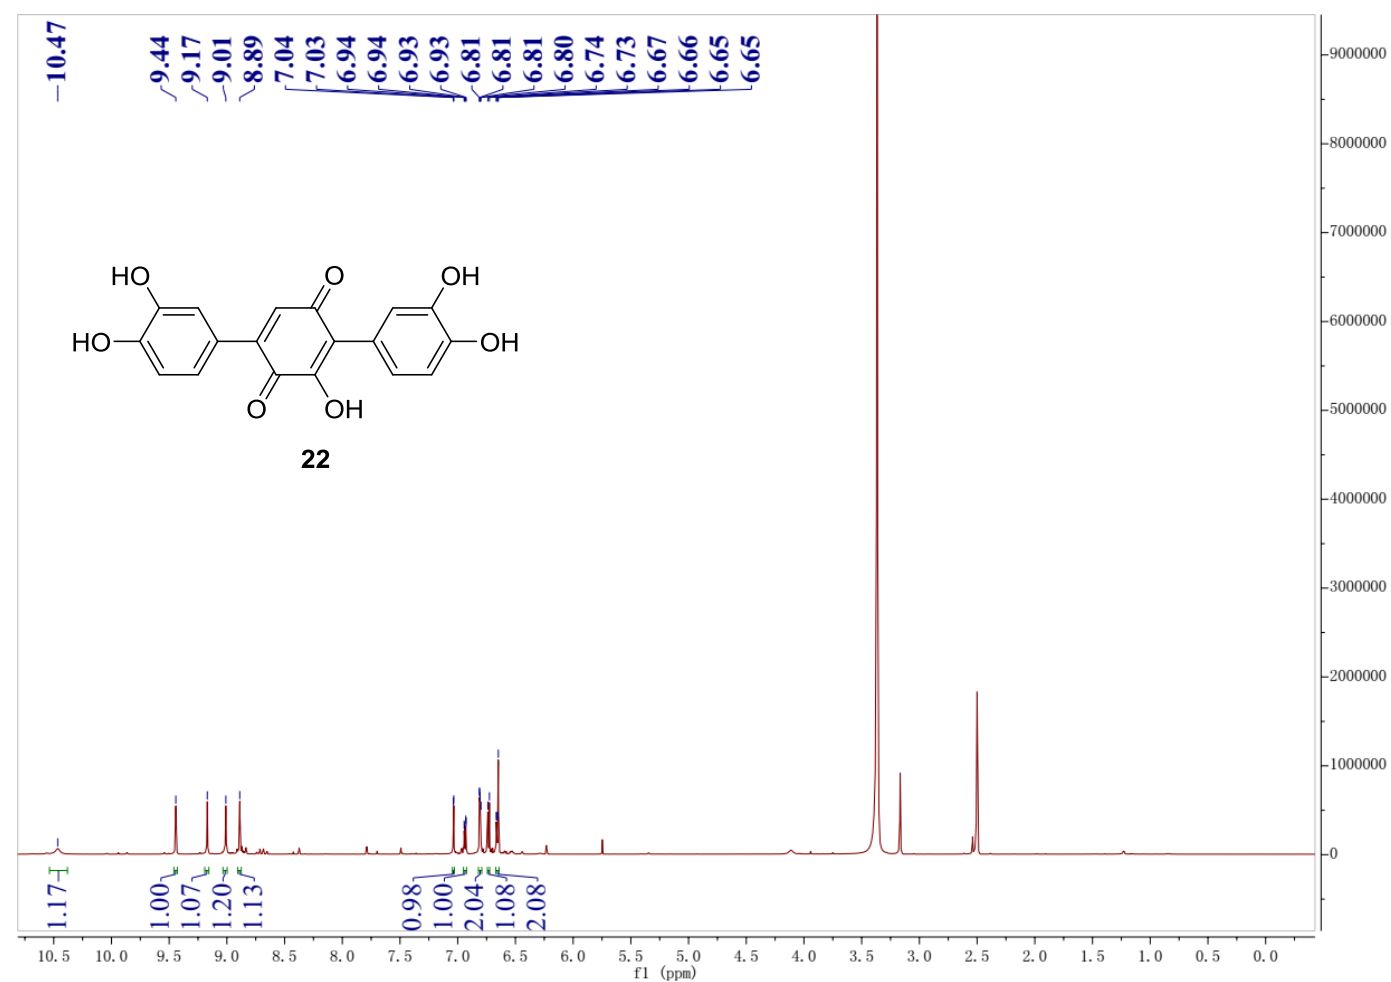

**Figure S27.**  $^{13}\text{C}$ -NMR spectrum of compound **22** in  $\text{DMSO-}d_6$

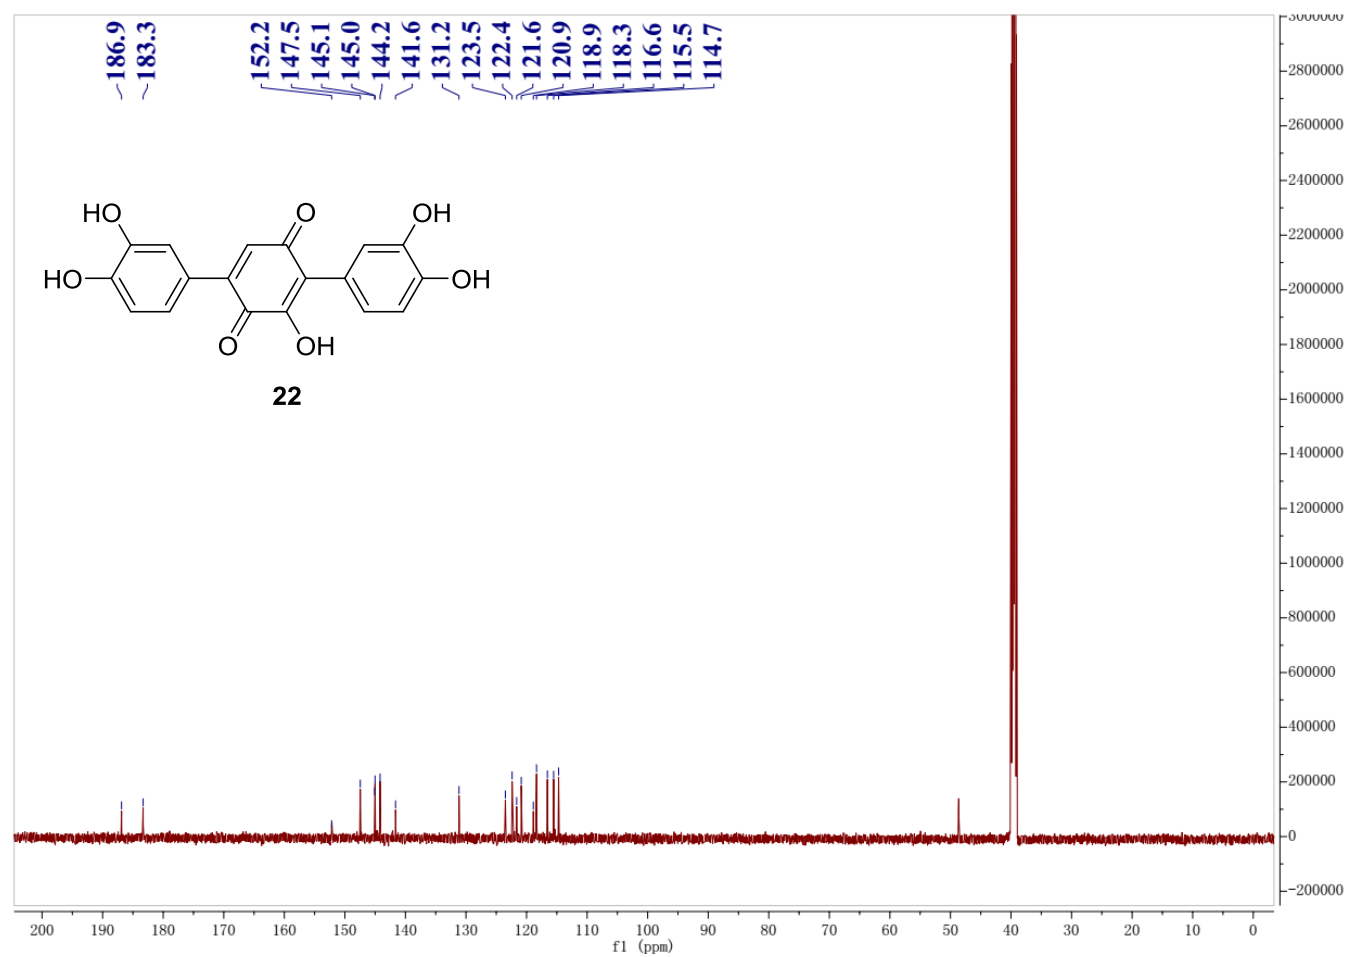

**Figure S28.** HRESIMS spectrum of compound **23**

DZ68-9-X#26 RT: 0.12 AV: 1 NL: 2.81E7  
T: FTMS + p ESI Full ms [120.0000-1600.0000]

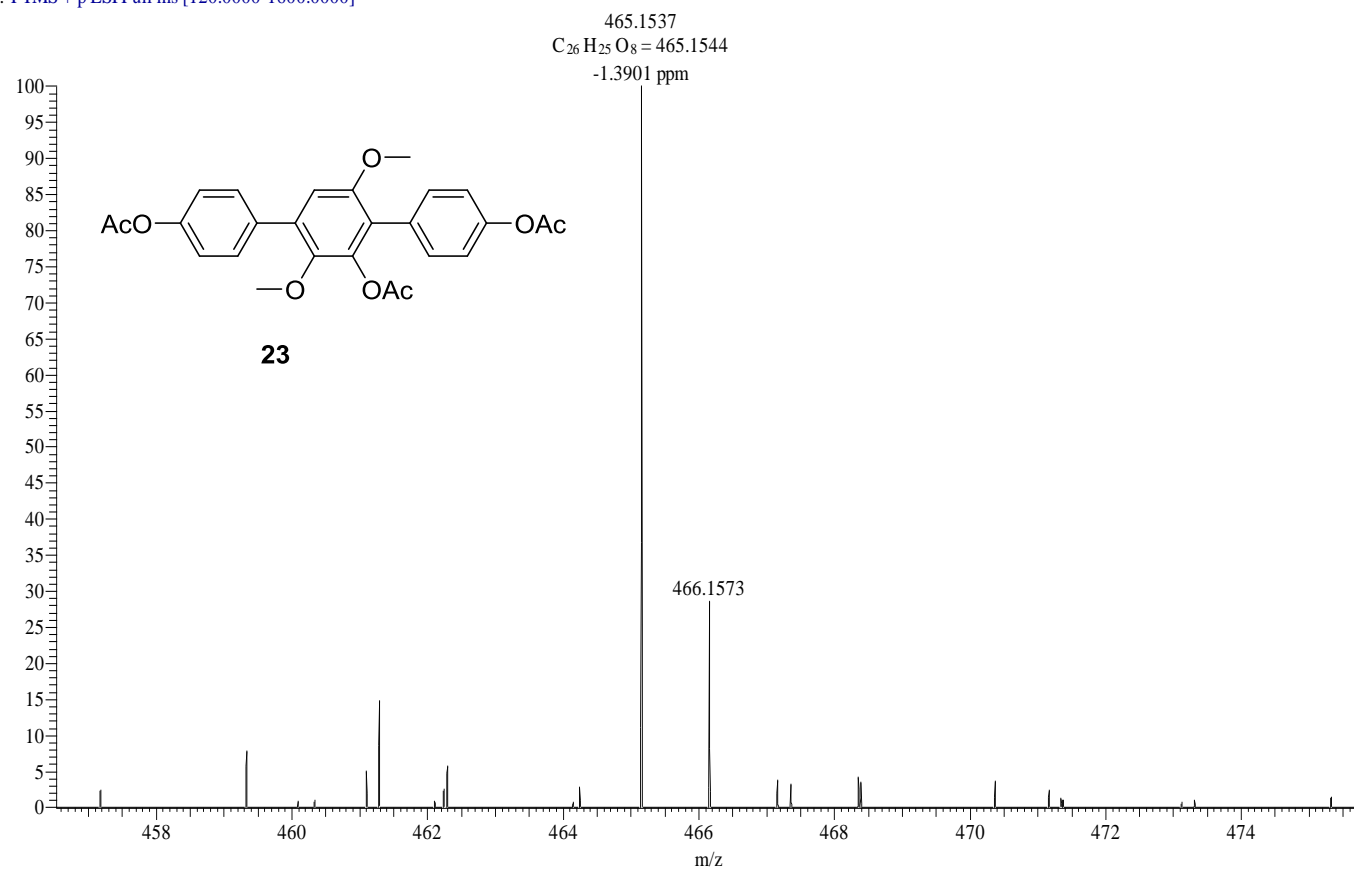

**Figure S29.**  $^1\text{H-NMR}$  spectrum of compound **23** in  $\text{DMSO-}d_6$ 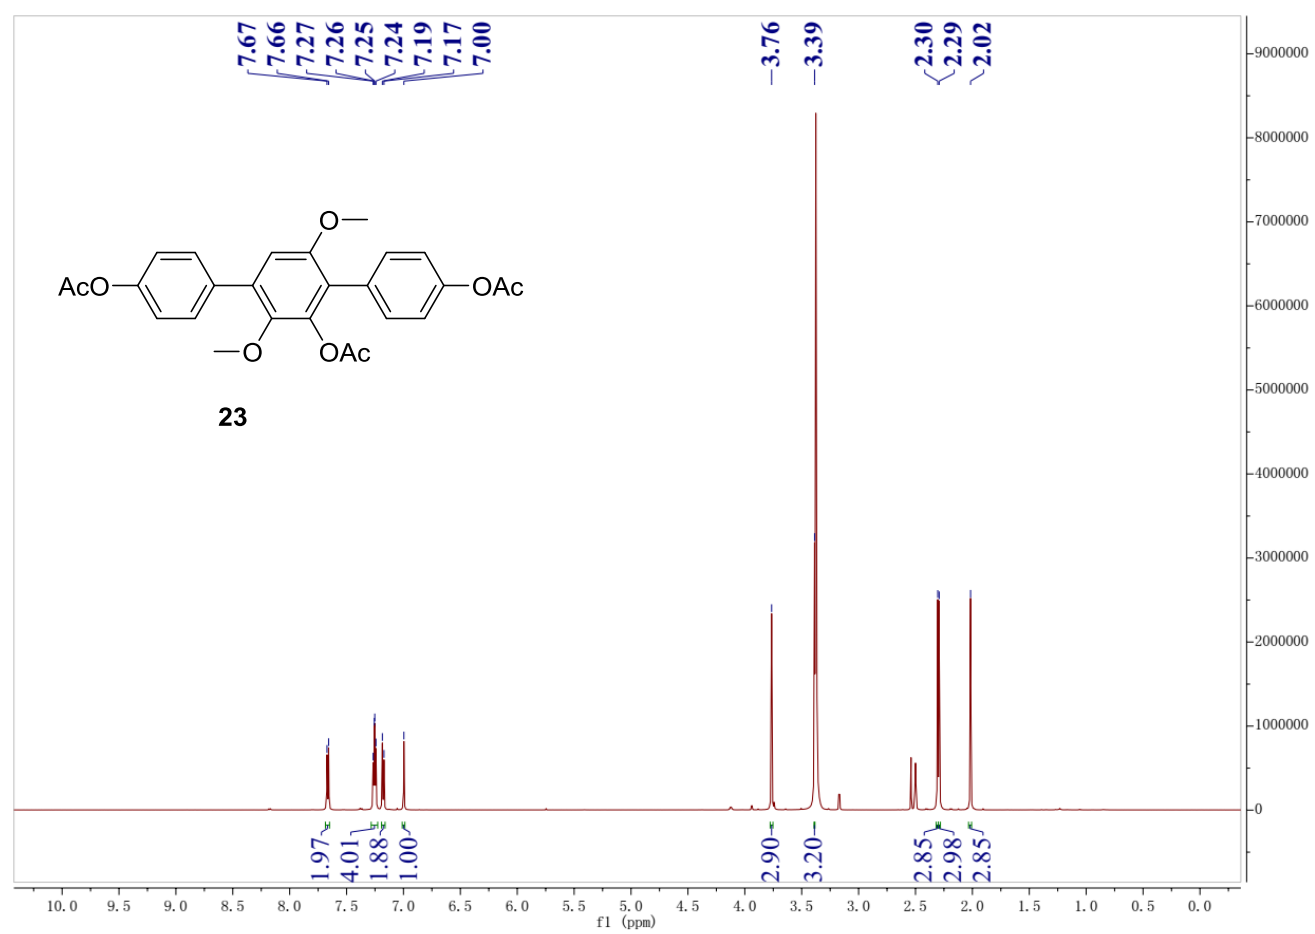**Figure S30.**  $^{13}\text{C-NMR}$  spectrum of compound **23** in  $\text{DMSO-}d_6$ 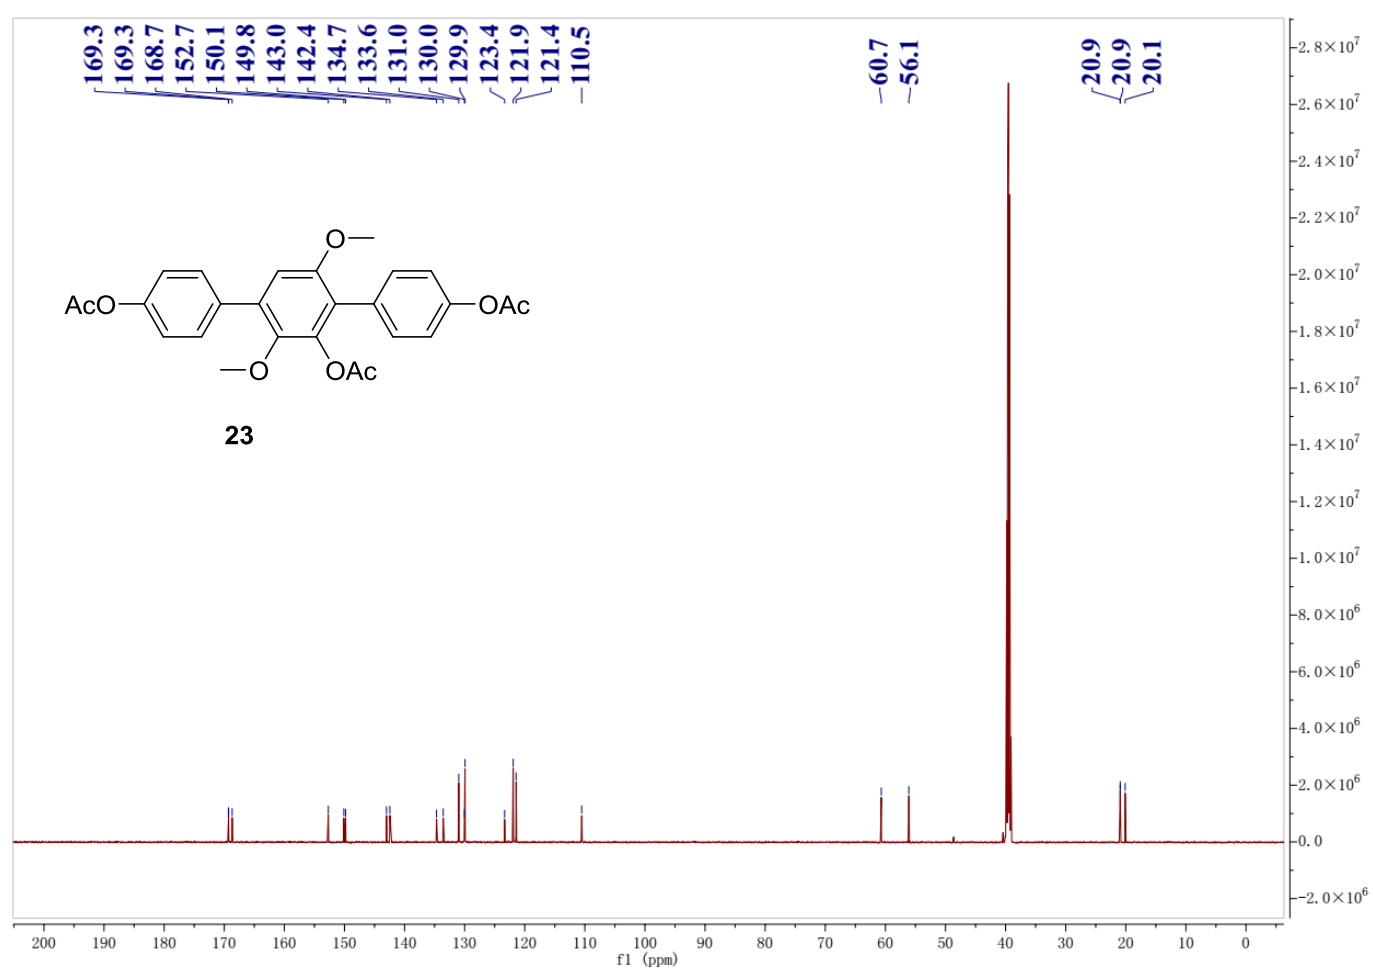

Figure S31. <sup>1</sup>H-NMR spectrum of compound **24** in CDCl<sub>3</sub>

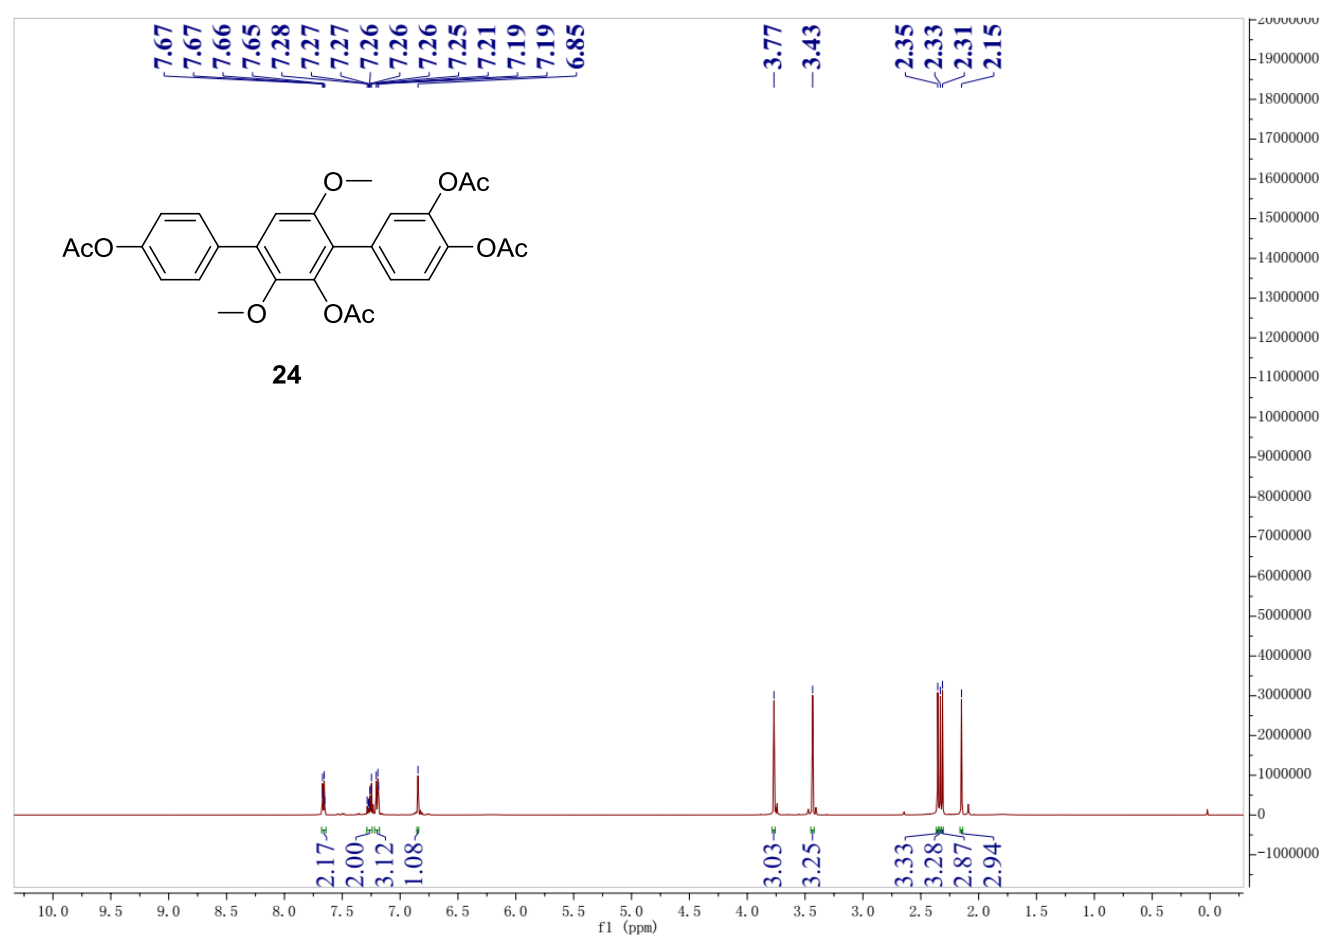

Figure S32. <sup>13</sup>C-NMR spectrum of compound **24** in CDCl<sub>3</sub>

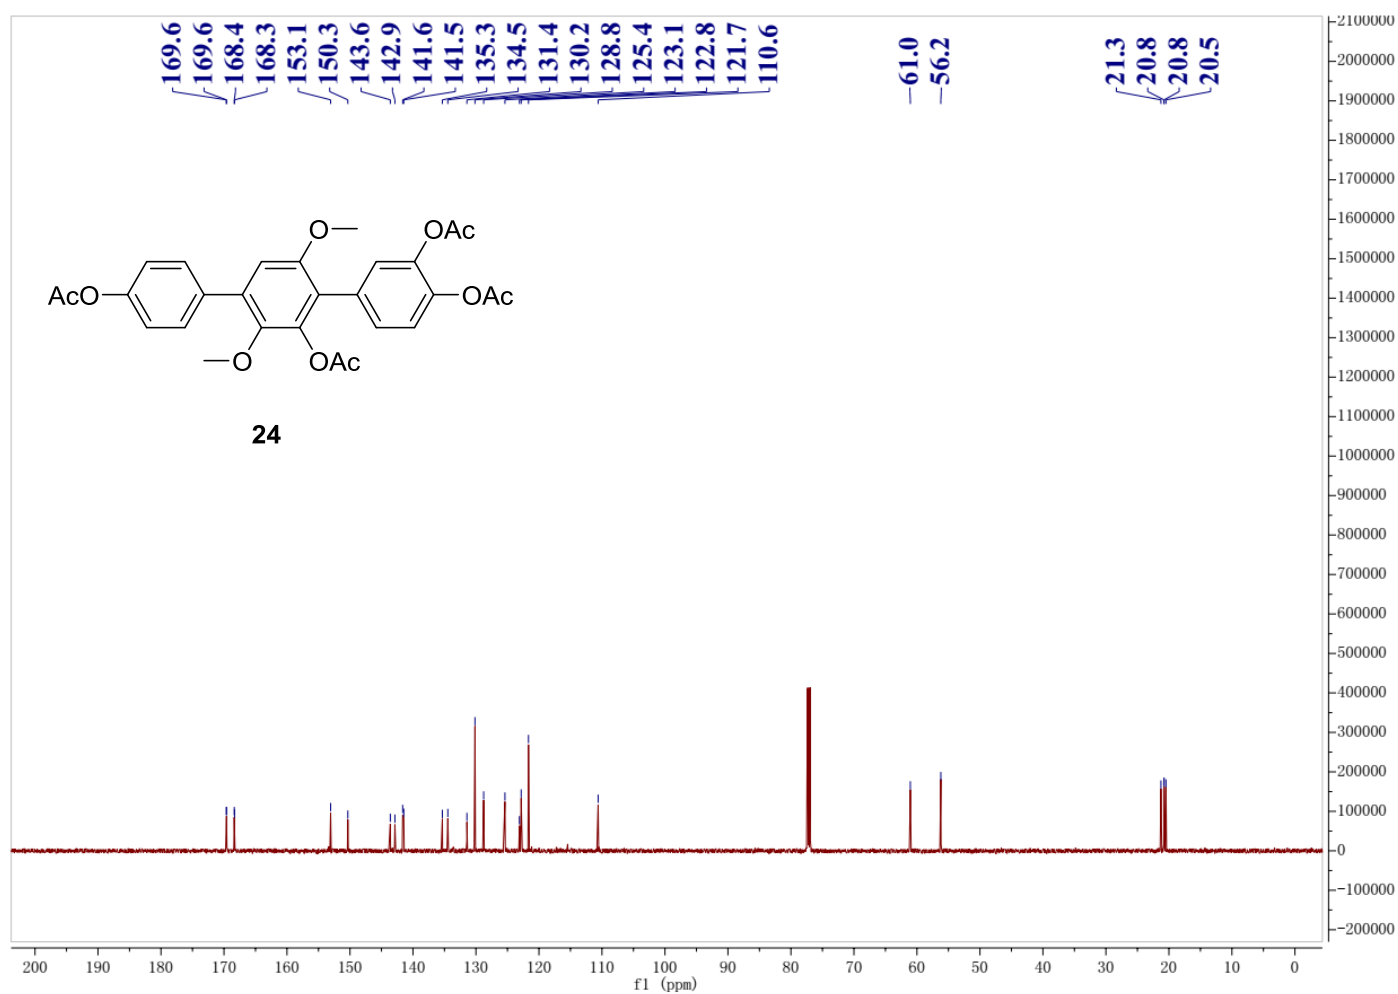

**Figure S33.** HRESIMS spectrum of compound **25**

DZ68-7-X\_201013152700 #26 RT: 0.12 AV: 1 NL: 3.01E8  
T: FTMS + p ESI Full ms [120.0000-1600.0000]

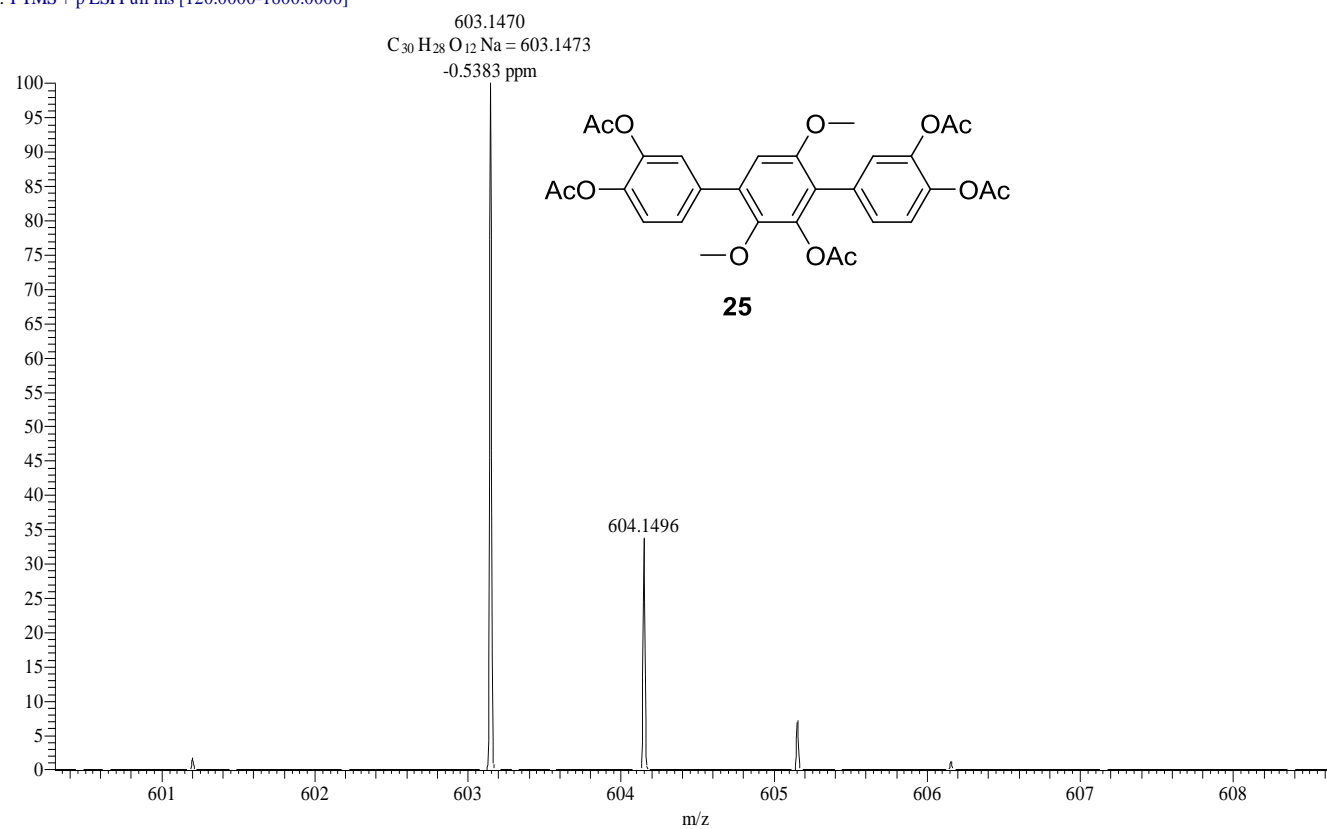**Figure S34.**  $^1H$ -NMR spectrum of compound **25** in  $CDCl_3$ 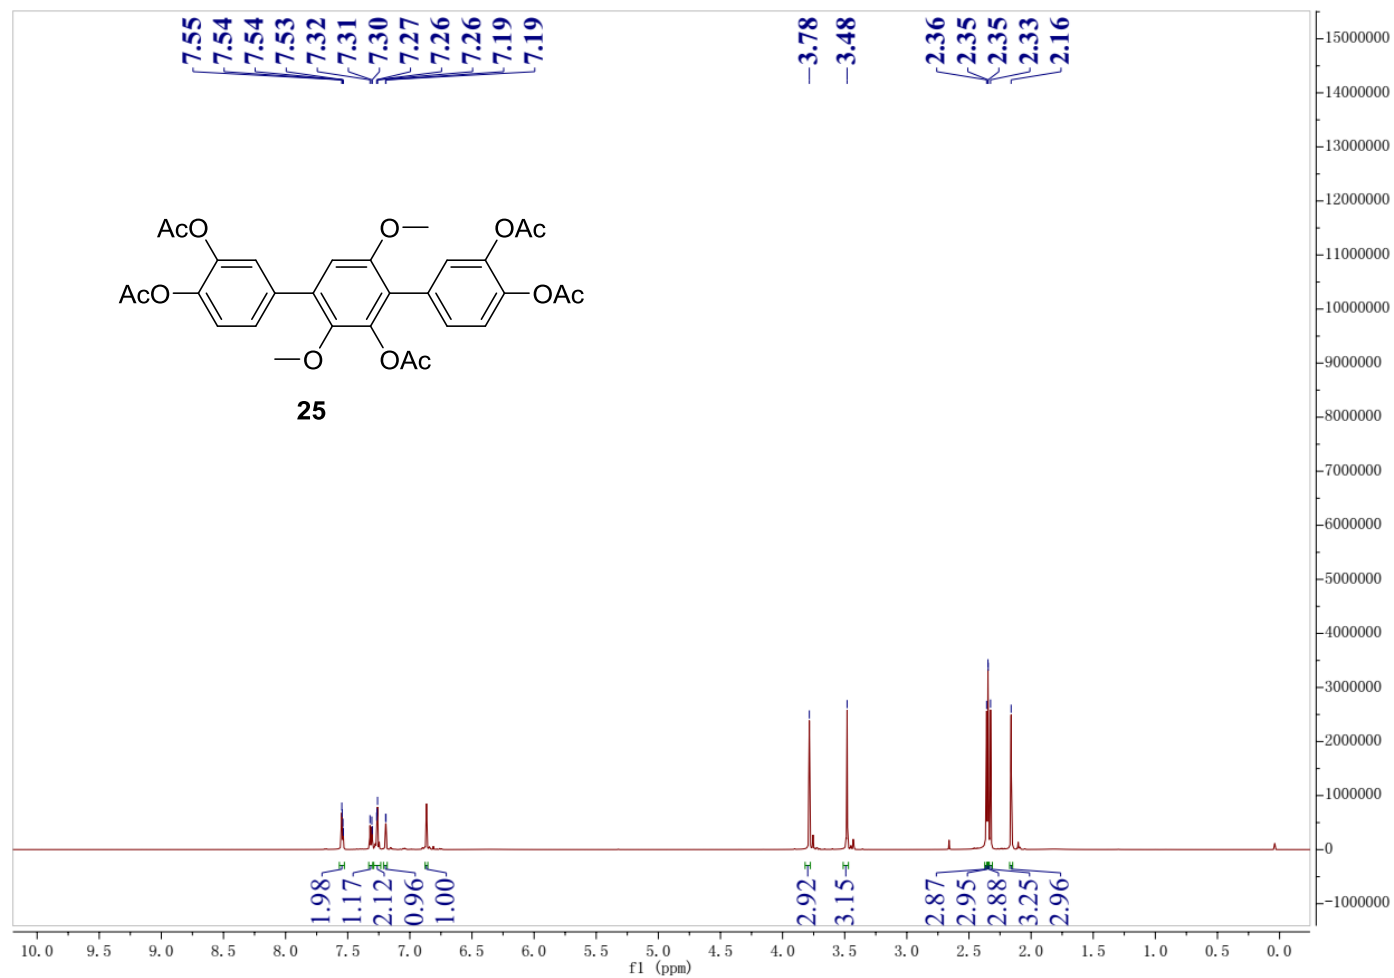

Figure S35.  $^{13}\text{C}$ -NMR spectrum of compound **25** in  $\text{CDCl}_3$

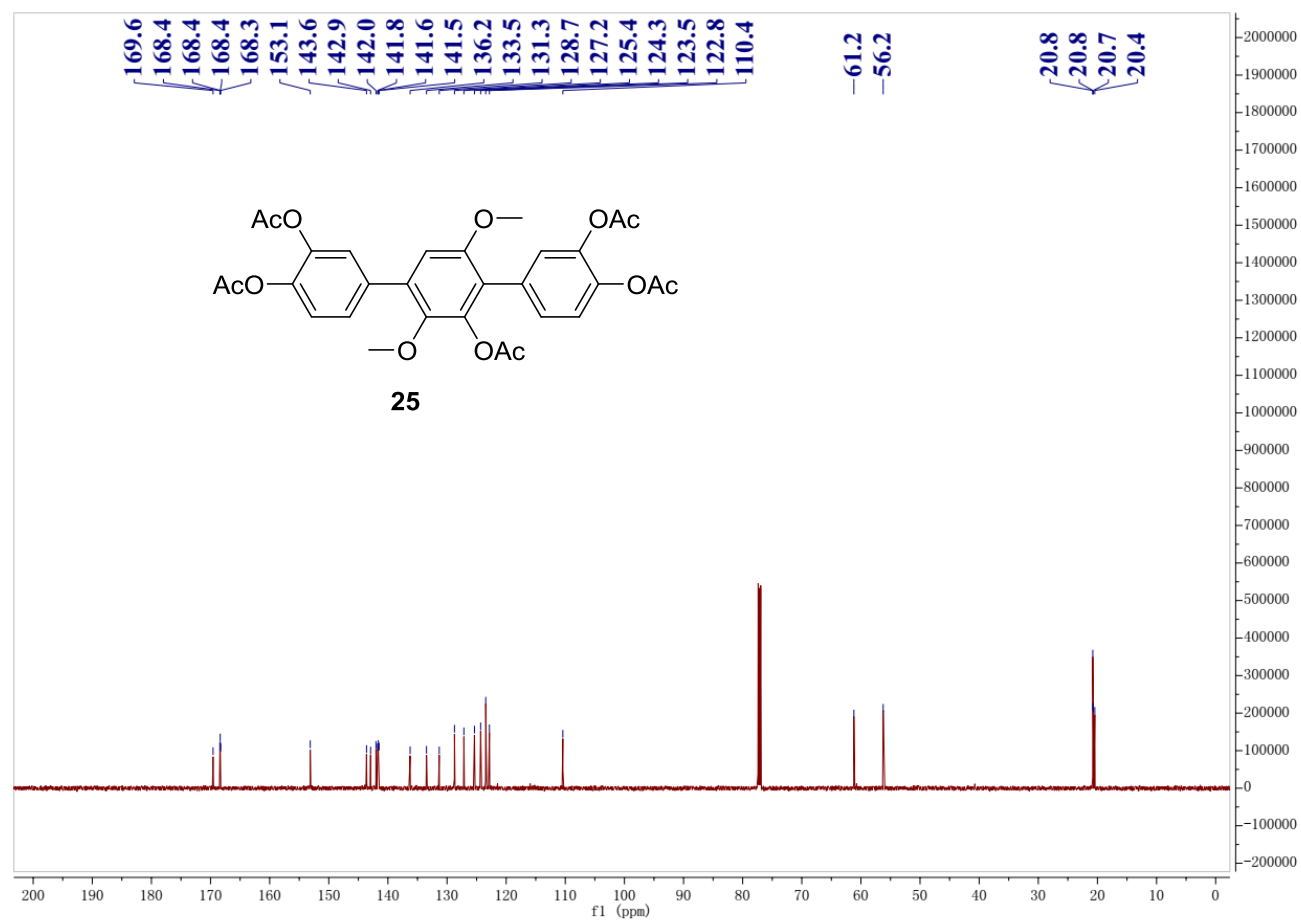

Figure S36. ORAC curves of compounds **1–25** and trolox

a. Testing concentration:  $6.25\ \mu\text{M}$

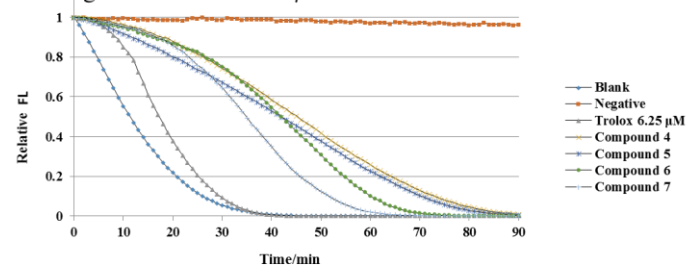

b. Testing concentration:  $12.5\ \mu\text{M}$

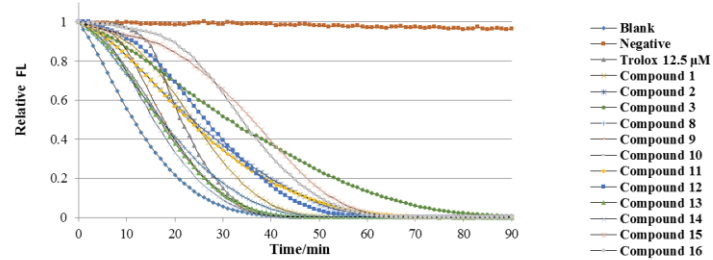

c. Testing concentration:  $25\ \mu\text{M}$

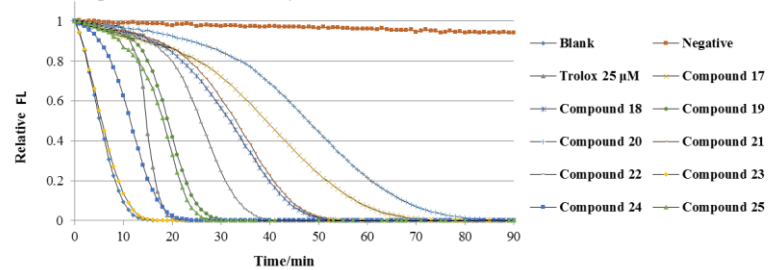

**Figure S37.** HPLC detection for transformation of compound **6** to compound **15** in different conditions and reaction time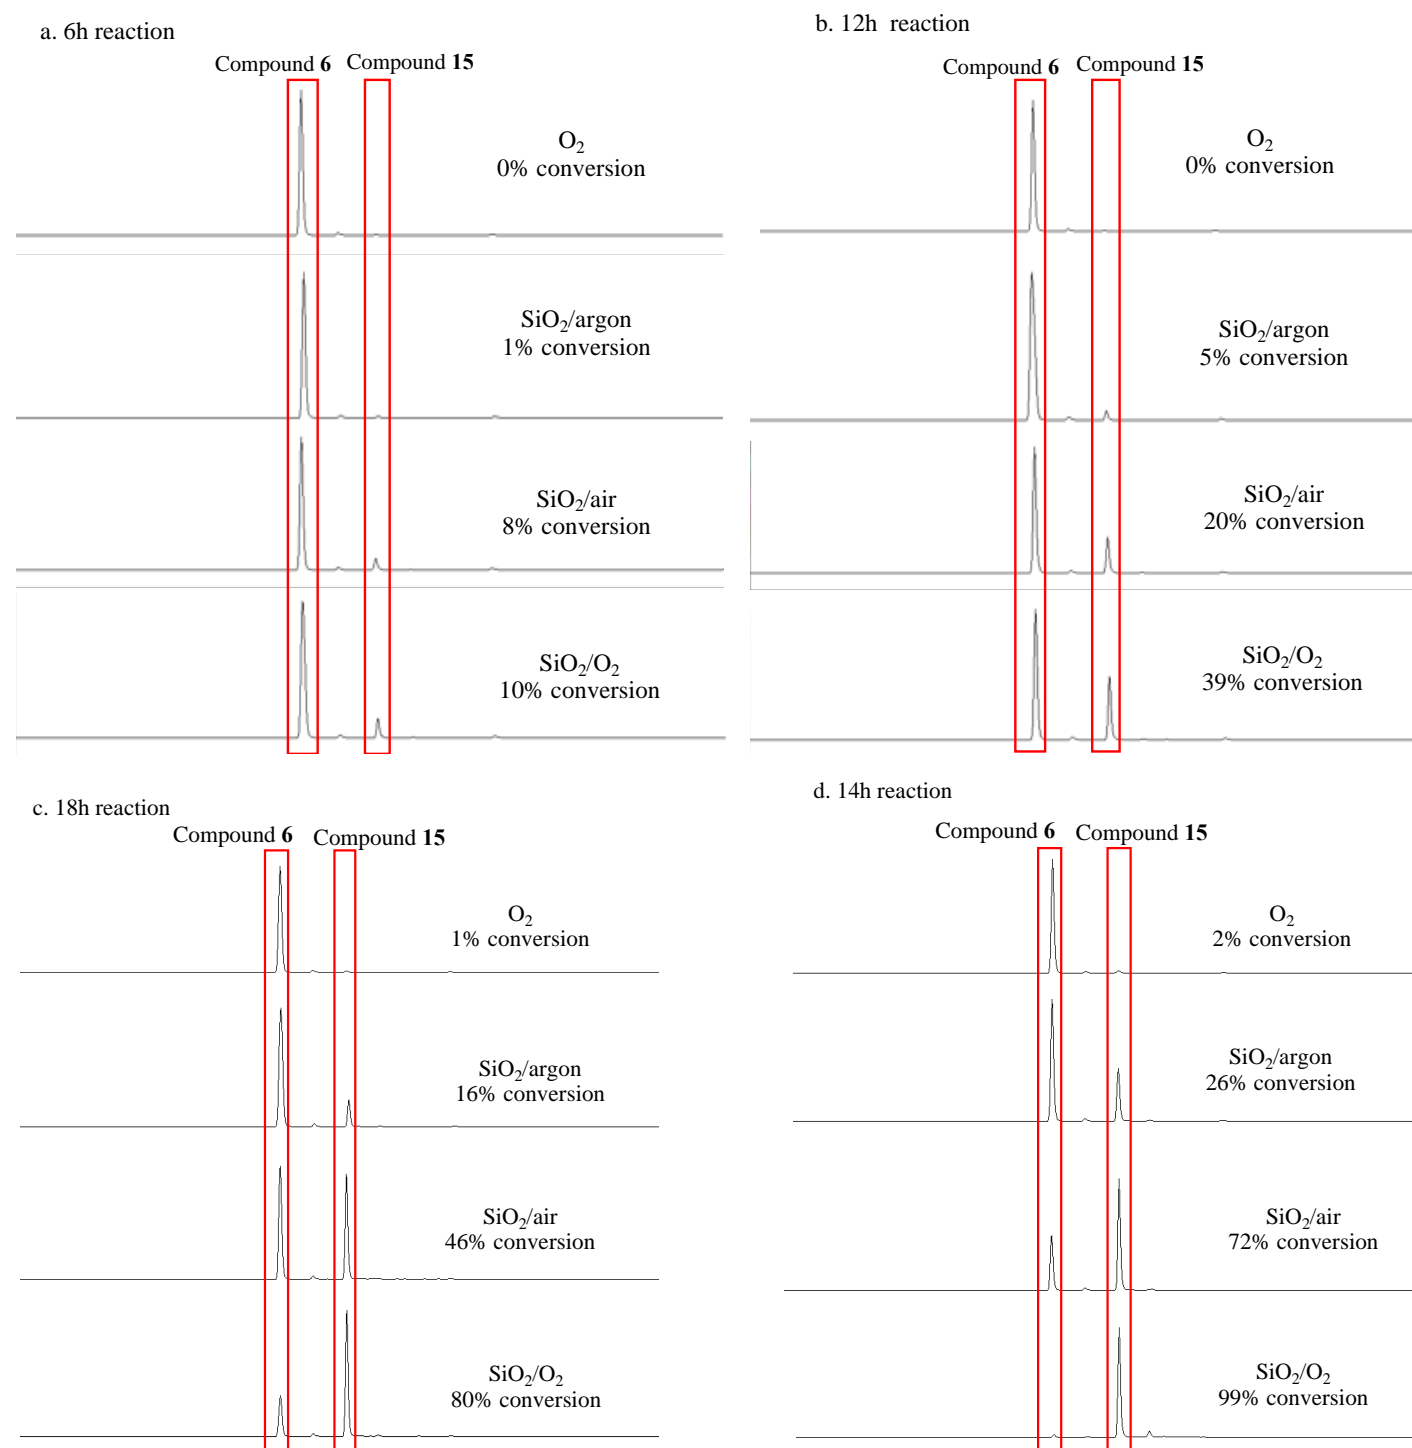

Supplement: Data_Sheet_1.pdf [file Data_Sheet_1.pdf]
